# Supplementary material for: Elevated Detection of Dual Antibody B Cells Identifies Lupus Patients With B Cell-Reactive VH4-34 Autoantibodies
Source: PubMed Central journal article supplement (PMC8854503; doi:10.3389/fimmu.2022.795209), 2022-02-04
Supplement: DataSheet_1.pdf [file DataSheet_1.pdf]

*Supplementary Material*

**Elevated detection of dual antibody B cells identifies lupus patients  
with B cell-reactive VH4-34 autoantibodies**

Jacob N. Peterson, Susan A. Boackle, Sophina H. Taitano, Allison Sang, Julie Lang, Margot Kelly, Jeremy T. Rahkola, Anjelica M. Miranda, Ryan M. Sheridan, Joshua M. Thurman, V. Koneti Rao, Raul M. Torres, and Roberta Pelanda

Content: Figures S1-S5, Tables S1-S4

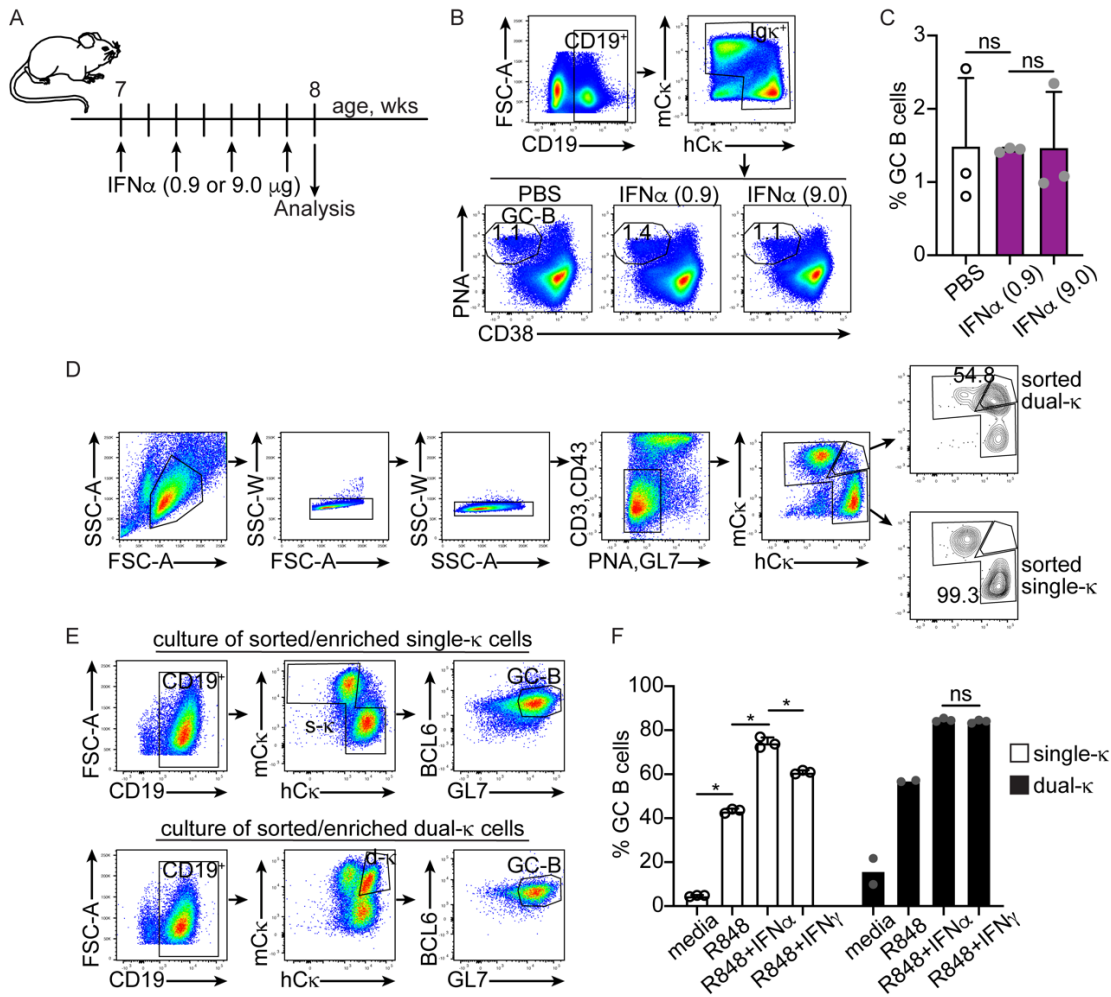

**Figure S1: IFN $\alpha$  and IFN $\gamma$  synergize with TLR7 to promote the differentiation of single- $\kappa$  and dual- $\kappa$  MRL/*lpr* B cells into GC B cells.**

A) Schematics for the *in vivo* treatment of 7 weeks old MRL/*lpr* mice with PBS or IFN $\alpha$  at two different doses. B) Flow cytometric gating strategy of spleen B cells from MRL/*lpr* mice injected with either PBS or IFN $\alpha$  to measure the frequency of PNA<sup>high</sup>CD38<sup>low</sup> GC B cells within all  $\kappa^+$  B cells. C) Frequency of PNA<sup>high</sup>CD38<sup>low</sup> GC B cells within all  $\kappa^+$  B cells from MRL/*lpr* mice treated with either PBS or IFN $\alpha$ . N=3 per group, analyzed over one experiment. D) Fluorescence activated cell sorting of CD43<sup>-</sup>CD3<sup>-</sup>PNA<sup>-</sup>GL7<sup>-</sup> single- $\kappa$  and dual- $\kappa$  (non-GC) B cells from a combined sample of spleen B cells isolated from a total of 12 MRL/*lpr* mice (11-16 weeks of age). The contour plots show the degree of purity of the sorted populations. E) Representative flow cytometric analysis and gating of the enriched single- $\kappa$  and dual- $\kappa$  MRL/*lpr* B cells, sorted as shown in (D), after 60 hours of culture in media alone or with R848, R848+IFN $\alpha$ , or R848+IFN $\gamma$ . The cells were serially gated to measure BCL6<sup>+</sup>GL7<sup>high</sup> GC B cells within the single- $\kappa$  (s- $\kappa$ ) and dual- $\kappa$  (d- $\kappa$ ) B cell populations. F) Frequencies of BCL6<sup>+</sup>GL7<sup>high</sup> GC B cells within the sorted single- $\kappa$  and dual- $\kappa$  MRL/*lpr* B cells cultured as described in (E). N=1 biological sample (mix of 12 mice) cultured in 3 replica wells per condition (except N=2 wells for dual- $\kappa$  cultured in media alone or with R848), analyzed in one experiment. Data in bar graphs are shown as mean+SD. Statistical analysis was performed with a one-tailed Mann-Whitney *U* test. \**p*≤0.05; ns=not significant.

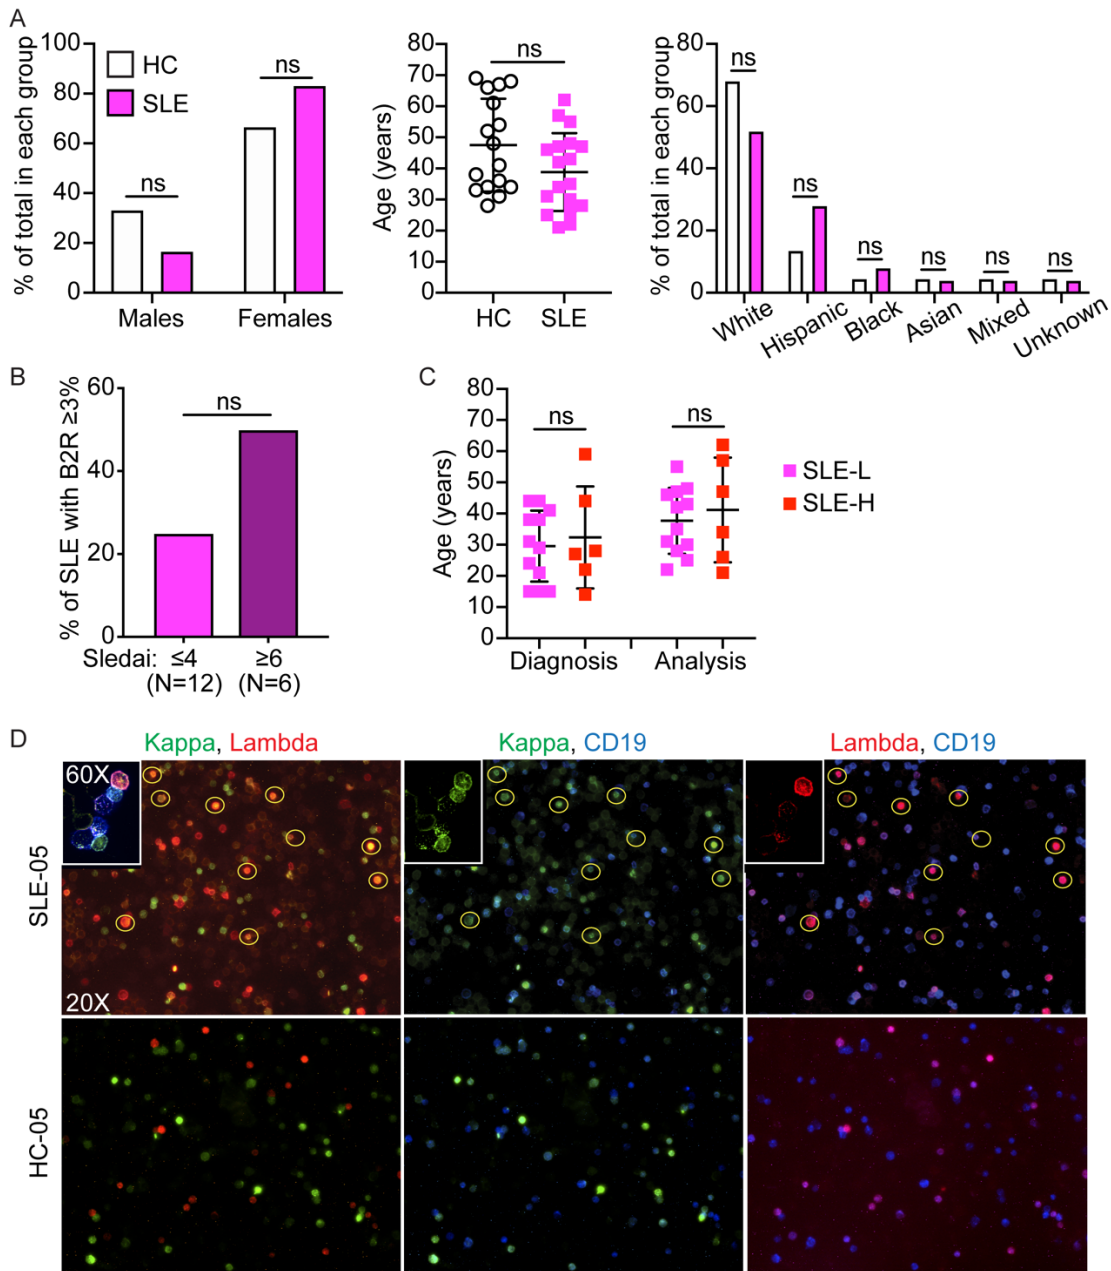

**Figure S2: Characteristics of human subjects, and cytospin analysis of  $\kappa^+\lambda^+$  B cells.**

A) Sex, age (with mean $\pm$ SD), race and ethnicity distribution of SLE patients and healthy controls. N=18 for both groups. Statistical analysis was performed by either two-tailed Fisher's exact test (sex and race) or t-test (age); ns=not significant. B) Percentage of SLE patients with B<sub>2R</sub> cells  $\geq 3\%$  within groups with SLEDAI scores  $\leq 4$  or  $\geq 6$ . Statistical analysis was performed by two-tailed Fisher's exact test. C) Age (with mean $\pm$ SD) of SLE patients at diagnosis and at time of analysis in groups with low B<sub>2R</sub> cells (SLE-L) and high B<sub>2R</sub> cells (SLE-H). Statistical analysis was performed by two-tailed Mann-Whitney *U* test. D) Fluorescent microscopy analysis of PBMCs spun on cytospin slides from one SLE patient (SLE-05) and one healthy control (HC-05). The slides were stained for Ig $\kappa$  (green), Ig $\lambda$  (red), and CD19 (blue), and analyzed at 20X magnification (or 60X in insets). The yellow circles highlight cells positive for both  $\kappa$  and  $\lambda$  light chains.

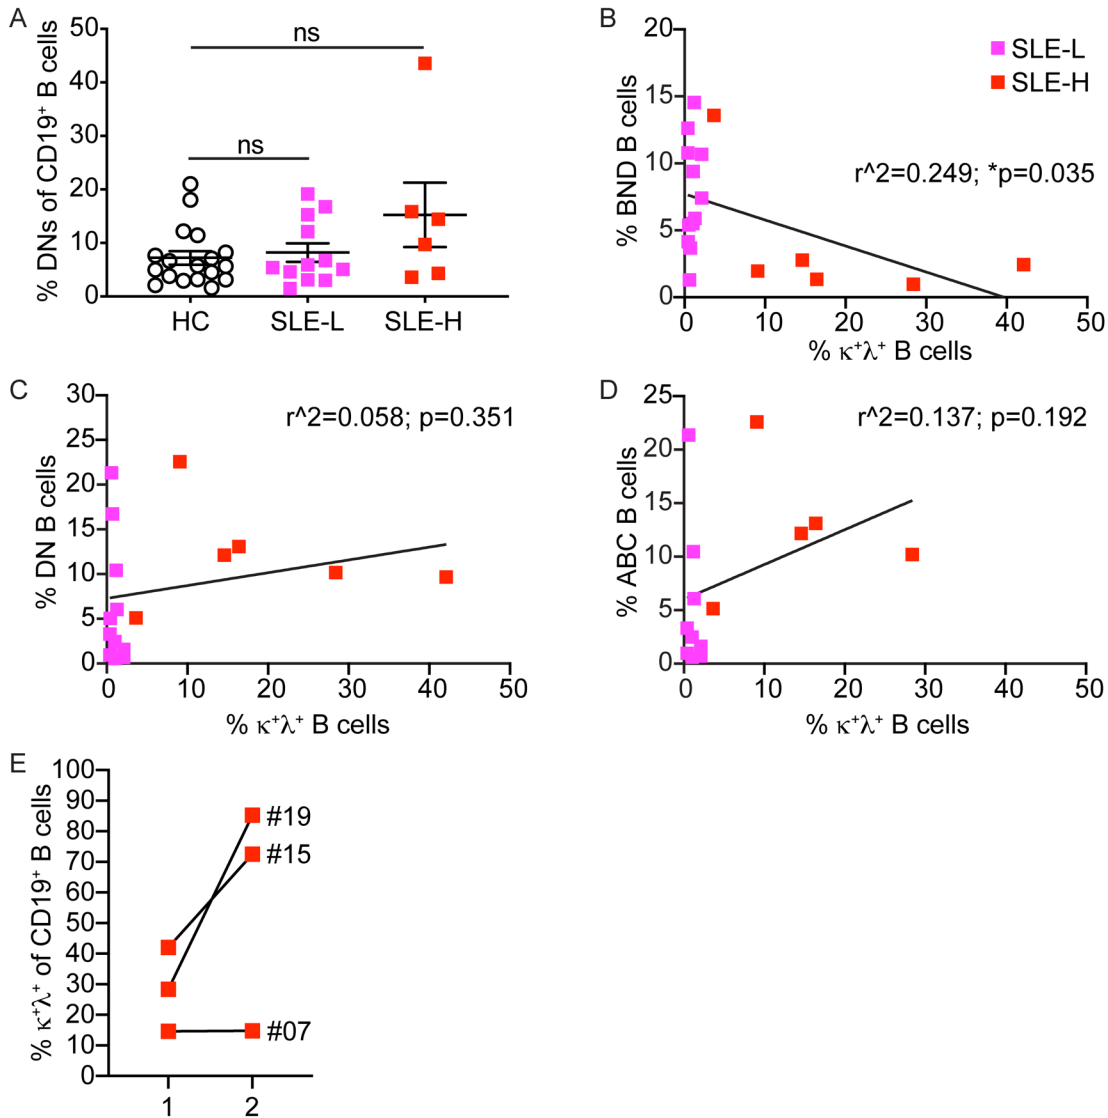

**Figure S3: Analysis of B cell subsets and their relationship.**

A) Frequency of CD27-IgD<sup>-</sup> DN cells within the CD19<sup>+</sup> B cell population of healthy controls (HC, N=18), and SLE patients with low B<sub>2R</sub> (SLE-L, N=12) or high B<sub>2R</sub> (SLE-H, N=6) cells. DN cells were gated as shown in Figure 3A. Each symbol is a subject, and bars represent mean±SD. Statistical analysis was performed with a Mann-Whitney *U* test; ns=not significant. B-D) Scatter plot analyses of the percentage of  $\kappa^+\lambda^+$  B cells (x-axis) relative to the percentage (on y-axis) of BND (B), DN (C), or ABC (D) B cells within the CD19<sup>+</sup> cell population of SLE-H patients. Data were analyzed by Simple linear regression. E) Frequency of  $\kappa^+\lambda^+$  cells within the blood over time. Analyses were performed in two blood samples obtained 6 months to 2 years apart from SLE-H patients # 07, 15, and 19.

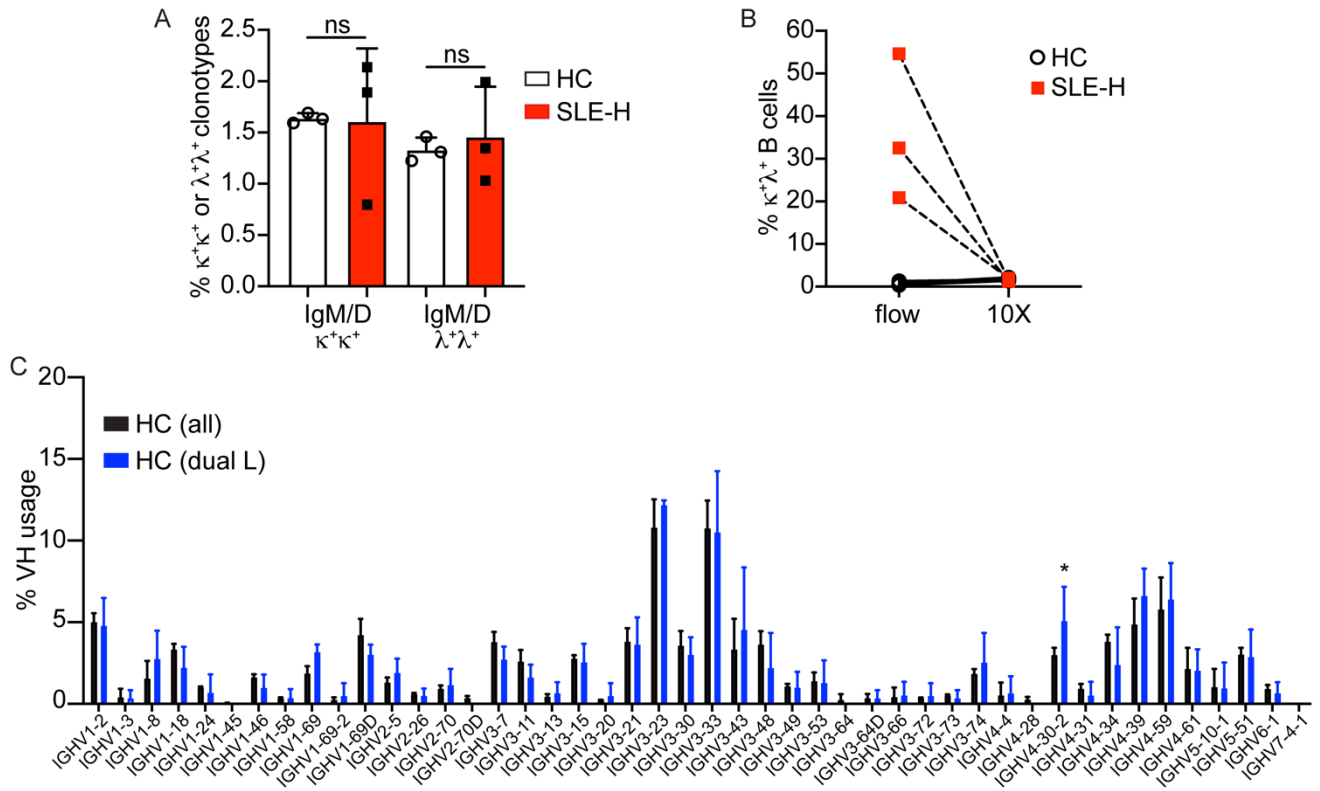

**Figure S4: Single cell V(D)J-seq analysis of human B cells.**

A) Percentage of unswitched (IgM/D) B cell clonotypes bearing one heavy chain and two  $\kappa$  or two  $\lambda$  genes. Symbols represent individual subjects and bars are mean+SD. Statistical analysis was performed with two-tailed Mann-Whitney  $U$  tests. B) Percentage of  $\kappa^+\lambda^+$  IgM/D B cell clonotypes measured by flow cytometry or 10X in the same SLE-H and healthy control (HC) subjects. Difference was significant only for SLE subjects ( $p=0.025$ ) as measured by t-test. C) Average (mean+SD) Ig VH usage among either all clonotypes (2,142-5,418 per sample) or dual-light chain ( $\kappa^+\kappa^+$ ,  $\lambda^+\lambda^+$ , and  $\kappa^+\lambda^+$ ) clonotypes (72-202 per sample) from three healthy controls (HC). Statistical analysis was performed with two-tailed unpaired t-test. \* $p\leq 0.05$ ; n.s.=not significant (differences were not significant when lacking asterisks).

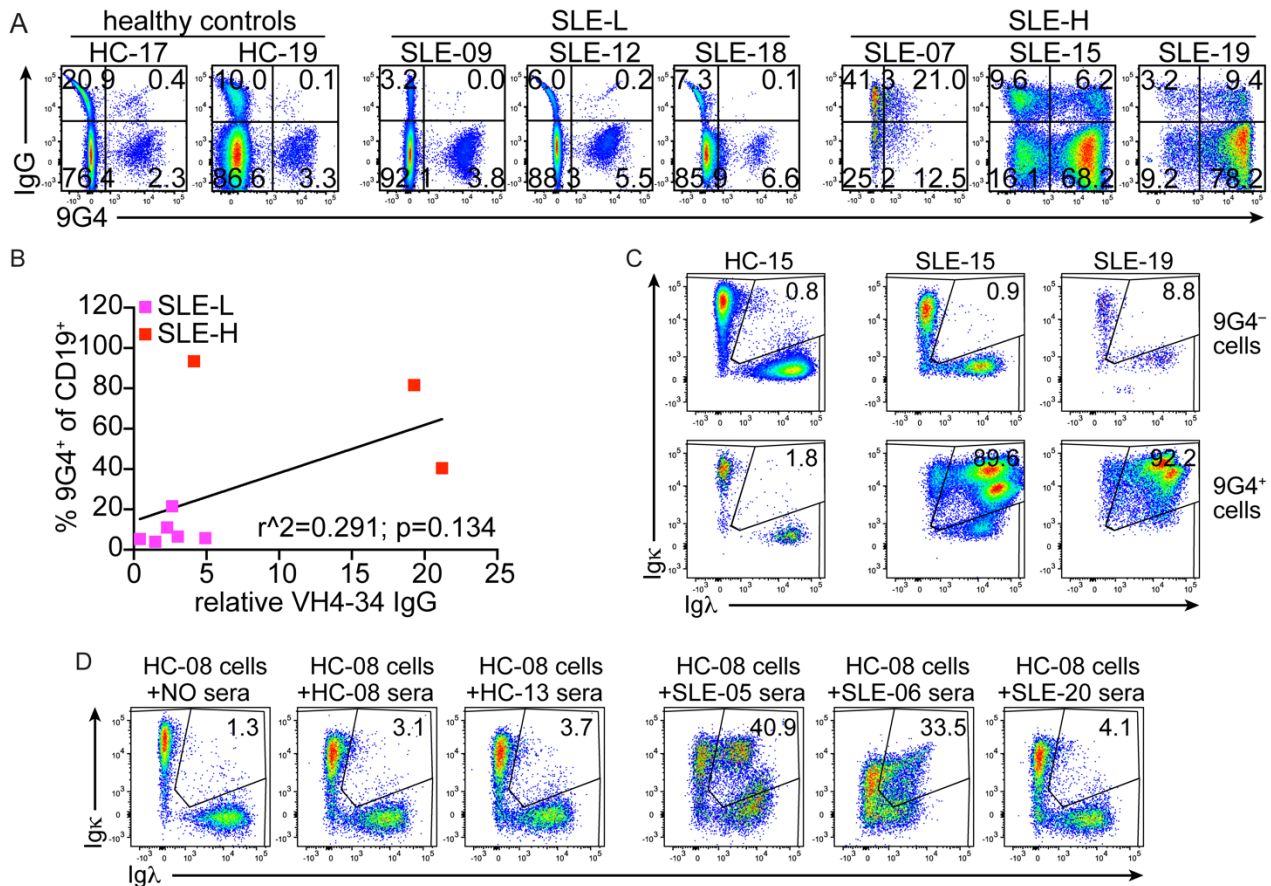

**Figure S5: Correlates of VH4-34 secreted antibodies and 9G4<sup>+</sup> B cells.**

A) Representative flow cytometric analyses of 9G4 (anti-VH4-34) staining vs IgG on CD19<sup>+</sup> gated B cells from healthy and SLE subjects. B) Scatter plot analyses of the percentage of 9G4<sup>+</sup> B cells (y-axis) relative to VH4-34 IgG relative sera titers (on x-axis) in SLE patients. N=9, 6 SLE-L and 3 SLE-H. Data were analyzed by simple linear regression. C) Representative flow cytometric analyses of Igk vs Igλ in 9G4<sup>-</sup> (top) and 9G4<sup>+</sup> (bottom) CD19<sup>+</sup> gated B cells. D) Flow cytometric analyses of Igk vs Igλ on CD19<sup>+</sup> gated B cells within healthy control HC-08 PBMCs that were incubated for 30 min at 4°C without or with sera from the same or a different healthy subject, or with sera from SLE-H individuals. All plots are representative of four healthy controls, four SLE-L patients, and three SLE-H patients analyzed over 4 independent analyses.

**Table S1: Characteristics of SLE patients and Healthy controls (HC)**

| *ID #  | Sex | **Race& Ethnicity | Age, diagnosis (years) | Age, analysis | Clinical manifestations                                                                                                                                                   | ***Medications                                   | SLEDAI score | PTPN22 allele | %κ <sup>+</sup> λ <sup>+</sup> of CD19 <sup>+</sup> |
|--------|-----|-------------------|------------------------|---------------|---------------------------------------------------------------------------------------------------------------------------------------------------------------------------|--------------------------------------------------|--------------|---------------|-----------------------------------------------------|
| SLE-01 | M   | W/NH              | 15                     | 30            | Demyelinating CNS lupus; Arthritis; Lymphopenia; ANA                                                                                                                      | HCQ; Triamterene-HCTZ                            | 0            | R620          | 1.19                                                |
| SLE-02 | F   | AA/NH             | 31                     | 35            | Discoid rash; Photosensitivity; Oral/nasal ulcers; Pericarditis, Pleuritis; Inflammatory myositis; Raynaud's; Lymphopenia; Lymphadenopathy; ANA; anti-Sm, RNP, SSA        | HCQ; Aspirin; MM                                 | 4            | R620          | 0.72                                                |
| SLE-03 | M   | W/NH              | 38                     | 42            | Pericarditis; Arthritis; Psoriasis; Lymphopenia; Eosinophilic esophagitis; partial IgA deficiency; ANA                                                                    | HCQ; MTX; Folic acid                             | 0            | R620          | 0.5                                                 |
| SLE-04 | F   | M/H               | 29                     | 31            | Malar rash; Photosensitivity; Pleuritis; Renal disease WHO III; Arthritis; Raynaud's; Slerodactyly; Retinal vasculitis; Lymphopenia; Lymphadenopathy; ANA; anti-dsDNA, Sm | HCQ; Prednisone; Lisinopril                      | 24           | R620          | 1.25                                                |
| SLE-05 | F   | W/NH              | 44                     | 47            | Pericarditis; Lymphopenia; ANA; anti-dsDNA, SSA                                                                                                                           | HCQ; Colchicine                                  | 2            | R620          | 16.4                                                |
| SLE-06 | F   | W/NH              | 59                     | 62            | Hemolytic anemia; Arthritis; Lymphopenia; Leukopenia; ANA; lupus anticoagulant; anti-dsDNA, cardioliplin, B2GP1                                                           | HCQ; Aspirin; Losartan-HCTZ                      | 2            | R620          | 9.07                                                |
| SLE-07 | F   | W/H               | 28                     | 34            | Malar rash; Photosensitivity; Pericarditis; Renal disease WHO IV; Arthritis;                                                                                              | Azathioprine; Prednisone; Metformin; Hydralazine | 8            | R620          | 14.6                                                |

Supplementary Material

|        |   |       |    |    |                                                                                                                                                                                                                        |                                                             |   |      |      |
|--------|---|-------|----|----|------------------------------------------------------------------------------------------------------------------------------------------------------------------------------------------------------------------------|-------------------------------------------------------------|---|------|------|
|        |   |       |    |    | Lymphopenia;<br>Leukopenia; ANA;<br>anti-dsDNA, Sm,<br>cardiolipin                                                                                                                                                     |                                                             |   |      |      |
| SLE-08 | F | W/NH  | 38 | 55 | Pleuritis; Oral/nasal<br>ulcers;<br>Hypothyroidism;<br>breast cancer;<br>Lymphopenia;<br>Leukopenia;<br>Thrombocytopenia;<br>ANA; lupus<br>anticoagulant                                                               | HCQ; Aspirin;<br>Cevimeline;<br>Losartan-HCTZ;<br>Meloxicam | 2 | R620 | 0.61 |
| SLE-09 | M | U/H   | 15 | 28 | Malar rash; lupus<br>encephalopathy;<br>Renal disease WHO<br>III; Arthritis;<br>Pancarditis;<br>Pancreatitis;<br>Myositis;<br>Lymphopenia;<br>Leukopenia;<br>Thrombocytopenia;<br>ANA; anti-dsDNA,<br>Sm, histone, SSB | HCQ;<br>Lisinopril;<br>Hydralazine;<br>Prednisone; MA       | 2 | R620 | 0.41 |
| SLE-10 | F | W/H   | 15 | 22 | Malar rash; Discoid<br>rash; Proteinuria,<br>Hematuria; Arthritis;<br>ANA; anti-dsDNA,<br>cardiolipin, B2GP1,<br>PS; PT                                                                                                | None                                                        | 6 | R620 | 2.09 |
| SLE-12 | F | W/H   | 24 | 43 | Renal disease WHO<br>IV; Arthritis;<br>Leukopenia; ANA;<br>anti-dsDNA                                                                                                                                                  | HCQ                                                         | 2 | R620 | 2.09 |
| SLE-13 | F | W/NH  | 21 | 25 | Malar rash; Renal<br>disease WHO III;<br>ANA; anti-dsDNA,<br>SM, RNP                                                                                                                                                   | HCQ; MM;<br>Ditiazem                                        | 2 | R620 | 1.0  |
| SLE-15 | F | AA/NH | 27 | 57 | Photosensitivity;<br>Oral/nasal ulcers;<br>Pericarditis; Arthritis;<br>Congestive heart<br>failure;<br>Lymphopenia;<br>Leukopenia; ANA;<br>anti-cardiolipin                                                            | Metoprolol                                                  | 4 | R620 | 42.1 |
| SLE-16 | F | W/NH  | 41 | 46 | Arthralgia;<br>Raynaud's;<br>Sjogren's;                                                                                                                                                                                | HCQ; Aspirin                                                | 2 | R620 | 0.43 |



|         |   |       |     |     |                                                                                                                                            |                                                                                                                        |     |      |      |
|---------|---|-------|-----|-----|--------------------------------------------------------------------------------------------------------------------------------------------|------------------------------------------------------------------------------------------------------------------------|-----|------|------|
|         |   |       |     |     | Lymphopenia; ANA;<br>anti-SSA, SSB                                                                                                         |                                                                                                                        |     |      |      |
| SLE-18  | F | W/NH  | 44  | 48  | Malar rash;<br>Photosensitivity;<br>Alopecia;<br>Lymphopenia; ANA;<br>anti-dsDNA, Sm                                                       | HCQ                                                                                                                    | 2   | R620 | 1.04 |
| SLE-19  | F | W/H   | 14  | 21  | Pleuritis; Pericarditis;<br>Renal disease WHO<br>III; Arthritis;<br>Pulmonary<br>hypertension; ANA;<br>anti-dsDNA; B2GP1                   | HCQ;<br>Prednisone; MF;<br>aspirin;<br>Ambrisentan;<br>Ivabradine;<br>Digoxin;<br>Omeprazole;<br>Bactrim;<br>Tadalafil | 6   | R620 | 28.4 |
| SLE-20  | F | W/H   | 22  | 26  | Discoid rash;<br>Photosensitivity;<br>Oral/nasal ulcers;<br>Pleuritic chest pain;<br>Arthritis;<br>Leukopenia;<br>Thrombocytopenia;<br>ANA | HCQ;<br>Prednisone; MF                                                                                                 | 6   | R620 | 3.62 |
| SLE-21  | F | A/H   | 44  | 47  | Malar rash;<br>Oral/nasal ulcers;<br>Inflammatory<br>myositis; Raynaud's;<br>Esophageal<br>dysmotility;<br>Lymphopenia; ANA;<br>anti-dsDNA | HCQ                                                                                                                    | 6   | R620 | 0.39 |
|         |   |       |     |     |                                                                                                                                            |                                                                                                                        |     |      |      |
|         |   |       |     |     |                                                                                                                                            |                                                                                                                        |     |      |      |
| HC-01   | M | W/NH  | N/A | 54  | N/A                                                                                                                                        | N/A                                                                                                                    | N/A | N/A  | 1.42 |
| HC-02.2 | F | AA/NH | N/A | N/A | N/A                                                                                                                                        | N/A                                                                                                                    | N/A | N/A  | 0.14 |
| HC-03   | M | W/NH  | N/A | N/A | N/A                                                                                                                                        | N/A                                                                                                                    | N/A | N/A  | 1.12 |
| HC-04   | F | N/A   | N/A | 66  | N/A                                                                                                                                        | N/A                                                                                                                    | N/A | N/A  | 0.38 |
| HC-05   | F | W/NH  | N/A | 34  | N/A                                                                                                                                        | N/A                                                                                                                    | N/A | N/A  | 0.46 |
| HC-06   | M | W/NH  | N/A | 69  | N/A                                                                                                                                        | N/A                                                                                                                    | N/A | N/A  | 0.6  |
| HC-07   | F | W/NH  | N/A | 41  | N/A                                                                                                                                        | N/A                                                                                                                    | N/A | N/A  | 0.7  |
| HC-08   | F | M/H   | N/A | 34  | N/A                                                                                                                                        | N/A                                                                                                                    | N/A | N/A  | 0.36 |
| HC-09   | M | W/NH  | N/A | 31  | N/A                                                                                                                                        | N/A                                                                                                                    | N/A | N/A  | 1.35 |
| HC-11   | F | W/NH  | N/A | 52  | N/A                                                                                                                                        | N/A                                                                                                                    | N/A | N/A  | 0.71 |
| HC-12   | M | W/NH  | N/A | 67  | N/A                                                                                                                                        | N/A                                                                                                                    | N/A | N/A  | 0.64 |
| HC-13   | F | W/H   | N/A | 33  | N/A                                                                                                                                        | N/A                                                                                                                    | N/A | N/A  | 0.25 |
| HC-14.2 | F | W/NH  | N/A | 61  | N/A                                                                                                                                        | N/A                                                                                                                    | N/A | N/A  | 1.25 |

Supplementary Material

|       |   |      |     |    |     |     |     |     |      |
|-------|---|------|-----|----|-----|-----|-----|-----|------|
| HC-15 | M | W/NH | N/A | 36 | N/A | N/A | N/A | N/A | 0.38 |
| HC-17 | F | W/NH | N/A | 48 | N/A | N/A | N/A | N/A | 0.91 |
| HC-18 | F | W/H  | N/A | 28 | N/A | N/A | N/A | N/A | 0.23 |
| HC-19 | F | W/NH | N/A | 68 | N/A | N/A | N/A | N/A | 1.76 |
| HC-21 | F | A/NH | N/A | 38 | N/A | N/A | N/A | N/A | 0.41 |

\*SLE patients in red are those with abnormally high frequency of  $\kappa^+\lambda^+$  B cells and designated SLE-H in the study

\*\*W=White; AA=African American or Black; A=Asian; M=Mixed race; U=Unknown race;

NH=Not Hispanic; H=Hispanic

\*\*\*HCQ=Hydroxychloroquine; MTX=Methotrexate; MM=Mycophenolic mofetil; MA=Mycophenolic acid

**Table S2: Characteristics of ALPS patients**

| ID #   | Age | Clinical manifestations               | % $\kappa^+\lambda^+$ of CD20 <sup>+</sup> |
|--------|-----|---------------------------------------|--------------------------------------------|
| 243.1  | 3   | thrombocytopenia, neutropenia         | 2.59                                       |
| 243.2  | 4   | anemia, thrombocytopenia              | 12.03                                      |
| 243.3  | 10  | neutropenia                           | 1.55                                       |
| 243.4  | 13  | uveitis                               | 2.45                                       |
| 243.5  | 18  | thrombocytopenia                      | 1.70                                       |
| 243.6  | 6   | neutropenia, thrombocytopenia, anemia | 2.86                                       |
| 243.7  | 16  | uveititis, nephritis                  | 1.17                                       |
| 243.8  | 19  | anemia, thrombocytopenia              | 0.36                                       |
| 243.9  | 8   | neutropenia, thrombocytopenia, anemia | 0.35                                       |
| 243.10 | 24  | anemia                                | 0.49                                       |

**Table S3: Efficiency of B cell preparation and capture for single cell RNA-seq analyses**

| *ID #  | **% live cells | **% CD19 <sup>+</sup> of live cells | Total cell # | B cell # (VDJ barcodes) | % B cells of total cells | Unique B cell clonotypes | ***B cell clonotypes with H and L |
|--------|----------------|-------------------------------------|--------------|-------------------------|--------------------------|--------------------------|-----------------------------------|
| SLE-07 | 88.6           | 30.9                                | 3,388        | 1,239                   | 36.6                     | 1,168                    | 908                               |
| SLE-15 | 93.8           | 13.1                                | 6,543        | 951                     | 14.5                     | 887                      | 831                               |
| SLE-19 | 91.7           | 76.7                                | 5,143        | 4,510                   | 87.7                     | 4,153                    | 4,005                             |
|        |                |                                     |              |                         |                          |                          |                                   |
| HC-07  | 78.1           | 73.2                                | 4,321        | 3,439                   | 79.6                     | 3,376                    | 3,310                             |
| HC-15  | 95.6           | 95.5                                | 5,554        | 5,431                   | 97.8                     | 5,418                    | 5,316                             |
| HC-19  | 65.8           | 90.7                                | 2,445        | 2,189                   | 89.6                     | 2,142                    | 1,916                             |

\*HC-07, HC-19, SLE-07, SLE-19 were processed by 10X Genomics and sequenced independently from HC-15 and SLE15 samples.

\*\*% of live cells and of CD19<sup>+</sup> cells were measured by flow cytometry after magnetic depletion of dead cells and non-B cells.

\*\*\*Clonotypes are B cells with unique V(D)J sequence heavy and light chain combinations.

Supplemental Table 4: VH4-34 B cell clonotypes from SLE patients and Heathy controls (HC)

| Sample        | clonotype_id         | igh_cdr3s                 | igh_v-genes        | igh_j              | igh_c        | igl_v-genes        | igl_j              | igl_c        | igk_v_genes        | igk_j              | igk_c        |
|---------------|----------------------|---------------------------|--------------------|--------------------|--------------|--------------------|--------------------|--------------|--------------------|--------------------|--------------|
| <b>SLE-07</b> | clonotype630         | CARGSPGSSWPRGYW           | IGHV4-34           | IGHJ4              | IGHM         |                    |                    |              | IGKV1-5            | IGKJ2              | IGKC         |
|               | clonotype12          | CARGTGYGGETGRDYYYYYGMDVW  | IGHV4-34           | IGHJ6              | IGHD         |                    |                    |              | IGKV1-9            | IGKJ2              | IGKC         |
|               | clonotype1161        | CARGATKGYCTNGVCENPPFDYW   | IGHV4-34           | IGHJ4              | IGHM         |                    |                    |              | IGKV1-27           | IGKJ1              | IGKC         |
|               | clonotype1009        | CARGIGGSGPW               | IGHV4-34           | IGHJ4              | IGHM         |                    |                    |              | IGKV1-39           | IGKJ2              | IGKC         |
|               | clonotype289         | CARWRRGTNGVHDYW           | IGHV4-34           | IGHJ4              | IGHD         |                    |                    |              | IGKV1D-39          | IGKJ3              | IGKC         |
|               | clonotype24          | CARGRTTVTRGAFDIW          | IGHV4-34           | IGHJ3              | IGHD         |                    |                    |              | IGKV3-20           | IGKJ1              | IGKC         |
|               | clonotype343         | CARGWSTTYYYGSGIARW        | IGHV4-34           | IGHJ4              | IGHM         |                    |                    |              | IGKV3-20           | IGKJ1              | IGKC         |
|               | clonotype574         | CARGRSQHLYYYYYMDVW        | IGHV4-34           | IGHJ6              | IGHD         |                    |                    |              | IGKV3D-15          | IGKJ4              | IGKC         |
| clonotype583  | CARRRLRLGELSSYAPFDYW | IGHV4-34                  | IGHJ4              | IGHM               |              |                    |                    | IGKV4-1      | IGKJ2              | IGKC               |              |
| <b>Sample</b> | <b>clonotype_id</b>  | <b>igh_cdr3s</b>          | <b>igh_v-genes</b> | <b>igh_j</b>       | <b>igh_c</b> | <b>igl_v-genes</b> | <b>igl_j</b>       | <b>igl_c</b> | <b>igk_v_genes</b> | <b>igk_j</b>       | <b>igk_c</b> |
| <b>SLE-15</b> | clonotype258         | CAREEDTAMVCAFDIW          | IGHV4-34           | IGHJ3              | IGHM         |                    |                    |              | IGKV1-8            | IGKJ3              | IGKC         |
|               | clonotype807         | CARVCISSGWYGVYDIDY        | IGHV4-34           | IGHJ4              | IGHM         |                    |                    |              | IGKV1-33           | IGKJ4              | IGKC         |
|               | clonotype378         | CAGARLGFYD                | IGHV4-34           | IGHJ4              | IGHM         |                    |                    |              | IGKV1D-13;IGKV2-24 | IGKJ5;IGKJ2        | IGKC;IGKC    |
|               | clonotype886         | CASTQYDFWWSGYEDYD         | IGHV4-34           | IGHJ4              | IGHM         |                    |                    |              | IGKV1D-17          | IGKJ2              | IGKC         |
|               | clonotype599         | CARGPRRIAARRGGWFDPW       | IGHV4-34           | IGHJ5              | IGHM         |                    |                    |              | IGKV1D-33          | IGKJ1              | IGKC         |
|               | clonotype462         | CVKNYYDSSGYAFDIW          | IGHV4-34           | IGHJ3              | IGHM         |                    |                    |              | IGKV1D-39          | IGKJ3              | IGKC         |
|               | clonotype115         | CARGRYDFWLFFDYD           | IGHV4-34           | IGHJ4              | IGHM         |                    |                    |              | IGKV1D-39          | IGKJ1              | IGKC         |
|               | clonotype729         | CARGVLLWFGAIRGNWFDPW      | IGHV4-34           | IGHJ5              | IGHM         |                    |                    |              | IGKV1D-39          | IGKJ1              | IGKC         |
|               | clonotype86          | CAREAGIAAAVKRWWFDPW       | IGHV4-34           | IGHJ5              | IGHM         |                    |                    |              | IGKV1D-39          | IGKJ1              | IGKC         |
|               | clonotype659         | CARGYDFWSYHMDVW           | IGHV4-34           | IGHJ6              | IGHM         |                    |                    |              | IGKV1D-39          | IGKJ1              | IGKC         |
|               | clonotype193         | CARSMIVVSSYWFYDLW         | IGHV4-34           | IGHJ2              | IGHM         |                    |                    |              | IGKV2-28           | IGKJ4              | IGKC         |
|               | clonotype854         | CARGANYGSGHWFDPW          | IGHV4-34           | IGHJ5              | IGHM         |                    |                    |              | IGKV3-11           | IGKJ5              | IGKC         |
|               | clonotype804         | CARGFQSGNGSGIDYD          | IGHV4-34           | IGHJ4              | IGHM         |                    |                    |              | IGKV3-20           | IGKJ5              | IGKC         |
|               | clonotype164         | CARAVPEMTTVVDFDYD         | IGHV4-34           | IGHJ4              | IGHM         |                    |                    |              | IGKV3D-15          | IGKJ2              | IGKC         |
|               | clonotype108         | CARGIAAAARHYYYYYMDVW      | IGHV4-34           | IGHJ6              | IGHM         |                    |                    |              | IGKV3D-20          | IGKJ5              | IGKC         |
|               | clonotype139         | CARLGVVVAASIW             | IGHV4-34           | IGHJ3              | IGHM         |                    |                    |              | IGKV4-1            | IGKJ1              | IGKC         |
|               | clonotype263         | CARAPSGGSYNYFYD           | IGHV4-34           | IGHJ4              | IGHM         |                    |                    |              | IGKV4-1            | IGKJ4              | IGKC         |
|               | clonotype132         | CATRAPTGWYDFW             | IGHV4-34           | IGHJ2              | IGHD         | IGLV1-40           | IGLJ3              | IGLC3        |                    |                    |              |
|               | clonotype266         | CARRDAQTNSGSYFRRNLGHWFDPW | IGHV4-34           | IGHJ5              | IGHM         | IGLV2-11           | IGLJ3              | IGLC2        |                    |                    |              |
|               | <b>Sample</b>        | <b>clonotype_id</b>       | <b>igh_cdr3s</b>   | <b>igh_v-genes</b> | <b>igh_j</b> | <b>igh_c</b>       | <b>igl_v-genes</b> | <b>igl_j</b> | <b>igl_c</b>       | <b>igk_v_genes</b> | <b>igk_j</b> |
| <b>SLE-19</b> | clonotype3932        | CARGVTA AAAA VSPNFDYD     | IGHV4-34           | IGHJ4              | IGHM         |                    |                    |              | IGKV1-5            | IGKJ4              | IGKC         |
|               | clonotype1874        | CARALSSSTFKYYFDSW         | IGHV4-34           | IGHJ4              | IGHM         |                    |                    |              | IGKV1-5            | IGKJ2              | IGKC         |
|               | clonotype1024        | CARGSNTYDYD               | IGHV4-34           | IGHJ4              | IGHM         |                    |                    |              | IGKV1-5            | IGKJ1              | IGKC         |
|               | clonotype660         | CARPRYCSGGSCSRALDYD       | IGHV4-34           | IGHJ4              | IGHM         |                    |                    |              | IGKV1-5            | IGKJ2              | IGKC         |
|               | clonotype3856        | CARVRYQVGDFLPHGMDVW       | IGHV4-34           | IGHJ6              | IGHM         |                    |                    |              | IGKV1-5            | IGKJ1              | IGKC         |
|               | clonotype28          | CARGGGYCSGGSCYSLLDYD      | IGHV4-34           | IGHJ4              | IGHM         |                    |                    |              | IGKV1-6            | IGKJ2              | IGKC         |
|               | clonotype1601        | CARGKEAVLRVRGGNSWFDPW     | IGHV4-34           | IGHJ5              | IGHM         |                    |                    |              | IGKV1-8            | IGKJ4              | IGKC         |
|               | clonotype599         | CARGQITTVVTTYYYYYGMDVW    | IGHV4-34           | IGHJ6              | IGHM         |                    |                    |              | IGKV1-8            | IGKJ1              | IGKC         |
|               | clonotype2292        | CARDSGGDYQDYD             | IGHV4-34           | IGHJ4              | IGHM         |                    |                    |              | IGKV1-9            | IGKJ4              | IGKC         |
|               | clonotype4116        | CARGITMVRGVYD             | IGHV4-34           | IGHJ4              | IGHM         |                    |                    |              | IGKV1-9            | IGKJ5              | IGKC         |
|               | clonotype2006        | CARNSIAADHYYYYYGMDVW      | IGHV4-34           | IGHJ6              | IGHD         |                    |                    |              | IGKV1-9            | IGKJ5              | IGKC         |
|               | clonotype3990        | CARGGGITMIVAPPHYGMDVW     | IGHV4-34           | IGHJ6              | IGHM         |                    |                    |              | IGKV1-9;IGKV2D-40  | IGKJ1;IGKJ1        | IGKC;IGKC    |
|               | clonotype3578        | CARVDRTYGSGSSGMDVW        | IGHV4-34           | IGHJ6              | IGHM         |                    |                    |              | IGKV1-9;IGKV4-1    | IGKJ3;IGKJ2        | IGKC;IGKC    |
|               | clonotype2497        | CARSYDSSGHGWYFDLW         | IGHV4-34           | IGHJ2              | IGHM         |                    |                    |              | IGKV1-12           | IGKJ5              | IGKC         |
|               | clonotype3244        | CARLRRGYCSGGSCRVERYFDLW   | IGHV4-34           | IGHJ2              | IGHM         |                    |                    |              | IGKV1-12           | IGKJ4              | IGKC         |
|               | clonotype1749        | CASLYGSGSYSNHW            | IGHV4-34           | IGHJ4              | IGHM         |                    |                    |              | IGKV1-16           | IGKJ2              | IGKC         |
|               | clonotype1287        | CARVKYSSGWYRGWFDPW        | IGHV4-34           | IGHJ5              | IGHM         |                    |                    |              | IGKV1-16           | IGKJ2              | IGKC         |
|               | clonotype3576        | CARGRLIAVLLPRAGEFDYD      | IGHV4-34           | IGHJ4              | IGHM         |                    |                    |              | IGKV1-16;IGKV1-5   | IGKJ4;IGKJ4        | IGKC;IGKC    |

|               |                           |          |       |      |  |  |  |                    |             |           |
|---------------|---------------------------|----------|-------|------|--|--|--|--------------------|-------------|-----------|
| clonotype2587 | CARGRGDYW                 | IGHV4-34 | IGHJ4 | IGHM |  |  |  | IGKV1-17           | IGKJ2       | IGKC      |
| clonotype511  | CARGAGVDTAMVPFDYW         | IGHV4-34 | IGHJ4 | IGHM |  |  |  | IGKV1-17           | IGKJ2       | IGKC      |
| clonotype682  | CARGSRGLRGDYW             | IGHV4-34 | IGHJ4 | IGHM |  |  |  | IGKV1-17           | IGKJ2       | IGKC      |
| clonotype3008 | CARGGDIVVVVAANPWYFDYW     | IGHV4-34 | IGHJ4 | IGHM |  |  |  | IGKV1-17           | IGKJ4       | IGKC      |
| clonotype1104 | CARGGDRNWFDPW             | IGHV4-34 | IGHJ5 | IGHM |  |  |  | IGKV1-17           | IGKJ3       | IGKC      |
| clonotype3855 | CARFGRDGYGYW              | IGHV4-34 | IGHJ4 | IGHM |  |  |  | IGKV1-17;IGKV2-30  | IGKJ3;IGKJ4 | IGKC;IGKC |
| clonotype3501 | CARSPYDRHFDYW             | IGHV4-34 | IGHJ4 | IGHM |  |  |  | IGKV1-27           | IGKJ1       | IGKC      |
| clonotype3130 | CARGAHSGYDDYW             | IGHV4-34 | IGHJ4 | IGHM |  |  |  | IGKV1-27           | IGKJ1       | IGKC      |
| clonotype3164 | CARVRITMVRGSRYFDYW        | IGHV4-34 | IGHJ4 | IGHM |  |  |  | IGKV1-33           | IGKJ2       | IGKC      |
| clonotype1165 | CARGLLTEDIVAYYYYGVVDVW    | IGHV4-34 | IGHJ6 | IGHD |  |  |  | IGKV1-39           | IGKJ1       | IGKC      |
| clonotype3159 | CARGFRFDYGLRYFDYW         | IGHV4-34 | IGHJ4 | IGHM |  |  |  | IGKV1D-16          | IGKJ4       | IGKC      |
| clonotype3572 | CARGGPYGGNSGYW            | IGHV4-34 | IGHJ4 | IGHM |  |  |  | IGKV1D-33          | IGKJ2       | IGKC      |
| clonotype1064 | CATGDSGYVPRW              | IGHV4-34 | IGHJ4 | IGHM |  |  |  | IGKV1D-33          | IGKJ4       | IGKC      |
| clonotype1506 | CARGPWFDPW                | IGHV4-34 | IGHJ5 | IGHM |  |  |  | IGKV1D-33          | IGKJ4       | IGKC      |
| clonotype1657 | CAISSGSKGYFQHW            | IGHV4-34 | IGHJ1 | IGHM |  |  |  | IGKV1D-39          | IGKJ2       | IGKC      |
| clonotype3256 | CARTSSGYYYDSSGRDAFDIW     | IGHV4-34 | IGHJ3 | IGHM |  |  |  | IGKV1D-39          | IGKJ2       | IGKC      |
| clonotype98   | CASTGEGQQLAQGYW           | IGHV4-34 | IGHJ4 | IGHM |  |  |  | IGKV1D-39          | IGKJ4       | IGKC      |
| clonotype3320 | CARSNRGVVTPDYFDYW         | IGHV4-34 | IGHJ4 | IGHD |  |  |  | IGKV1D-39          | IGKJ2       | IGKC      |
| clonotype2289 | CARGGADDYGDYRFDYW         | IGHV4-34 | IGHJ4 | IGHM |  |  |  | IGKV1D-39          | IGKJ5       | IGKC      |
| clonotype824  | CARGGPGYSYGLDYW           | IGHV4-34 | IGHJ4 | IGHM |  |  |  | IGKV1D-39          | IGKJ1       | IGKC      |
| clonotype3308 | CARETAVAVNFDYW            | IGHV4-34 | IGHJ4 | IGHM |  |  |  | IGKV1D-39          | IGKJ3       | IGKC      |
| clonotype1634 | CASIAARRGGSPFDYW          | IGHV4-34 | IGHJ4 | IGHM |  |  |  | IGKV1D-39          | IGKJ2       | IGKC      |
| clonotype1757 | CARPRYCSGGSCSRALDYW       | IGHV4-34 | IGHJ4 | IGHM |  |  |  | IGKV1D-39          | IGKJ5       | IGKC      |
| clonotype1850 | CARSLGYCSSTSCSNFDYW       | IGHV4-34 | IGHJ4 | IGHM |  |  |  | IGKV1D-39          | IGKJ1       | IGKC      |
| clonotype2590 | CARAPRIAAGTPDW            | IGHV4-34 | IGHJ4 | IGHM |  |  |  | IGKV1D-39          | IGKJ4       | IGKC      |
| clonotype3592 | CARPTGYSSWFDPW            | IGHV4-34 | IGHJ4 | IGHM |  |  |  | IGKV1D-39          | IGKJ1       | IGKC      |
| clonotype2554 | CARDPRLEQLVRGAFDPW        | IGHV4-34 | IGHJ5 | IGHM |  |  |  | IGKV1D-39          | IGKJ1       | IGKC      |
| clonotype3720 | CARGRLRSTFRGSTAPAWFDPW    | IGHV4-34 | IGHJ5 | IGHM |  |  |  | IGKV1D-39          | IGKJ3       | IGKC      |
| clonotype807  | CAREVARCSGGSCYSGVDYYGMDVW | IGHV4-34 | IGHJ6 | IGHM |  |  |  | IGKV1D-39          | IGKJ1       | IGKC      |
| clonotype830  | CARFDYGDQPGYYYGMDVW       | IGHV4-34 | IGHJ6 | IGHM |  |  |  | IGKV1D-39;IGKV2-28 | IGKJ4;IGKJ2 | IGKC;IGKC |
| clonotype3926 | CARGIPSRHSSGLDAFDIW       | IGHV4-34 | IGHJ3 | IGHM |  |  |  | IGKV2-28           | IGKJ1       | IGKC      |
| clonotype3449 | CARVKEPGIAAAAAGIAFDIW     | IGHV4-34 | IGHJ3 | IGHM |  |  |  | IGKV2-28           | IGKJ1       | IGKC      |
| clonotype9    | CARGVVGKALYFFDYW          | IGHV4-34 | IGHJ4 | IGHM |  |  |  | IGKV2-28           | IGKJ1       | IGKC      |
| clonotype1778 | CARRALGIAAAFIW            | IGHV4-34 | IGHJ3 | IGHM |  |  |  | IGKV2-28;IGKV2-30  | IGKJ2;IGKJ4 | IGKC;IGKC |
| clonotype979  | CAREEVGATVYW              | IGHV4-34 | IGHJ4 | IGHM |  |  |  | IGKV2-30           | IGKJ1       | IGKC      |
| clonotype5    | CARGRYFDYW                | IGHV4-34 | IGHJ4 | IGHM |  |  |  | IGKV2D-29          | IGKJ4       | IGKC      |
| clonotype2137 | CARWDGVRGNSRTPFDYW        | IGHV4-34 | IGHJ4 | IGHM |  |  |  | IGKV2D-29          | IGKJ2       | IGKC      |
| clonotype143  | CARGPTIGLDPW              | IGHV4-34 | IGHJ5 | IGHD |  |  |  | IGKV2D-29          | IGKJ2       | IGKC      |
| clonotype371  | CARGVFPGPYFDLW            | IGHV4-34 | IGHJ2 | IGHM |  |  |  | IGKV3-11           | IGKJ5       | IGKC      |
| clonotype741  | CARDNAVHGGAFDIW           | IGHV4-34 | IGHJ3 | IGHM |  |  |  | IGKV3-11           | IGKJ1       | IGKC      |
| clonotype2760 | CARGPEAAAGTQYYFDYW        | IGHV4-34 | IGHJ4 | IGHM |  |  |  | IGKV3-11           | IGKJ4       | IGKC      |
| clonotype2010 | CASRFTIWRGADYW            | IGHV4-34 | IGHJ4 | IGHM |  |  |  | IGKV3-11           | IGKJ3       | IGKC      |
| clonotype3518 | CARGRINTFGGVFDYW          | IGHV4-34 | IGHJ4 | IGHM |  |  |  | IGKV3-11           | IGKJ3       | IGKC      |
| clonotype749  | CARGLDTAMVFPYFDYW         | IGHV4-34 | IGHJ4 | IGHM |  |  |  | IGKV3-11           | IGKJ4       | IGKC      |
| clonotype2897 | CASRQPSSSWYGNWFDPW        | IGHV4-34 | IGHJ5 | IGHM |  |  |  | IGKV3-11           | IGKJ5       | IGKC      |
| clonotype4033 | CARVLA AAETGYYYGMDVW      | IGHV4-34 | IGHJ6 | IGHD |  |  |  | IGKV3-11           | IGKJ2       | IGKC      |
| clonotype2274 | CARVAGTGPVVIDYW           | IGHV4-34 | IGHJ4 | IGHD |  |  |  | IGKV3-11;IGKV3-20  | IGKJ4;IGKJ4 | IGKC;IGKC |
| clonotype3012 | CARGVPLGDCIGGSCYSAFDFW    | IGHV4-34 | IGHJ3 | IGHM |  |  |  | IGKV3-15           | IGKJ1       | IGKC      |
| clonotype966  | CARELGSSEYFQHW            | IGHV4-34 | IGHJ1 | IGHM |  |  |  | IGKV3-20           | IGKJ4       | IGKC      |
| clonotype311  | CARERWFGESIYWFDLW         | IGHV4-34 | IGHJ2 | IGHM |  |  |  | IGKV3-20           | IGKJ1       | IGKC      |
| clonotype3557 | CARGVSELELGHGGDAFDIW      | IGHV4-34 | IGHJ3 | IGHM |  |  |  | IGKV3-20           | IGKJ4       | IGKC      |
| clonotype2322 | CARETTKEVTTIAPW           | IGHV4-34 | IGHJ3 | IGHM |  |  |  | IGKV3-20           | IGKJ1       | IGKC      |
| clonotype1878 | CARGNSGSPDIYAFDIW         | IGHV4-34 | IGHJ3 | IGHM |  |  |  | IGKV3-20           | IGKJ2       | IGKC      |
| clonotype1091 | CARVSQGTVEAFDIW           | IGHV4-34 | IGHJ3 | IGHM |  |  |  | IGKV3-20           | IGKJ2       | IGKC      |

|               |                         |          |       |      |                   |             |             |           |       |      |
|---------------|-------------------------|----------|-------|------|-------------------|-------------|-------------|-----------|-------|------|
| clonotype2361 | CASERITMVRGSFDIW        | IGHV4-34 | IGHJ3 | IGHM |                   |             |             | IGKV3-20  | IGKJ2 | IGKC |
| clonotype1661 | CAKTYDSSGYYYGRAFDIW     | IGHV4-34 | IGHJ3 | IGHM |                   |             |             | IGKV3-20  | IGKJ1 | IGKC |
| clonotype421  | CARGSQEMATAFDYW         | IGHV4-34 | IGHJ4 | IGHD |                   |             |             | IGKV3-20  | IGKJ2 | IGKC |
| clonotype1096 | CARLGVSGEMAAAGMGYW      | IGHV4-34 | IGHJ4 | IGHM |                   |             |             | IGKV3-20  | IGKJ1 | IGKC |
| clonotype2805 | CARKGIGGVDYW            | IGHV4-34 | IGHJ4 | IGHM |                   |             |             | IGKV3-20  | IGKJ2 | IGKC |
| clonotype3452 | CARGRGSPPHDIYW          | IGHV4-34 | IGHJ4 | IGHM |                   |             |             | IGKV3-20  | IGKJ3 | IGKC |
| clonotype1394 | CARGRAARPEVPLDIYW       | IGHV4-34 | IGHJ4 | IGHM |                   |             |             | IGKV3-20  | IGKJ1 | IGKC |
| clonotype740  | CARLGRFVGATGVW          | IGHV4-34 | IGHJ4 | IGHM |                   |             |             | IGKV3-20  | IGKJ1 | IGKC |
| clonotype524  | CASSLAPLPGHYFDYW        | IGHV4-34 | IGHJ4 | IGHM |                   |             |             | IGKV3-20  | IGKJ1 | IGKC |
| clonotype1865 | CARGRRGYVVGPTVGPYFDSW   | IGHV4-34 | IGHJ4 | IGHM |                   |             |             | IGKV3-20  | IGKJ2 | IGKC |
| clonotype2862 | CARGGLSDYW              | IGHV4-34 | IGHJ4 | IGHM |                   |             |             | IGKV3-20  | IGKJ1 | IGKC |
| clonotype2844 | CARGQRAVYYYYDSSGLPFDYW  | IGHV4-34 | IGHJ4 | IGHM |                   |             |             | IGKV3-20  | IGKJ2 | IGKC |
| clonotype121  | CARRVELGYCSSTSCLNWFDPW  | IGHV4-34 | IGHJ5 | IGHM |                   |             |             | IGKV3-20  | IGKJ2 | IGKC |
| clonotype274  | CARLNYDSSGYIDPW         | IGHV4-34 | IGHJ5 | IGHM |                   |             |             | IGKV3-20  | IGKJ1 | IGKC |
| clonotype1711 | CARPQESKTGIAGRWFDPW     | IGHV4-34 | IGHJ5 | IGHM |                   |             |             | IGKV3-20  | IGKJ2 | IGKC |
| clonotype1192 | CAREGITGTTFFDPW         | IGHV4-34 | IGHJ5 | IGHM |                   |             |             | IGKV3-20  | IGKJ1 | IGKC |
| clonotype71   | CARGVQLWPLGMDVW         | IGHV4-34 | IGHJ6 | IGHM |                   |             |             | IGKV3-20  | IGKJ2 | IGKC |
| clonotype3239 | CARPPDVTVTPLMDYGMVDVW   | IGHV4-34 | IGHJ6 | IGHD |                   |             |             | IGKV3-20  | IGKJ2 | IGKC |
| clonotype4044 | CARVSDYYYGMDVW          | IGHV4-34 | IGHJ6 | IGHD |                   |             |             | IGKV3-20  | IGKJ2 | IGKC |
| clonotype3570 | CARNCSSTSCYPDSSSPGGVDVW | IGHV4-34 | IGHJ6 | IGHM |                   |             |             | IGKV3-20  | IGKJ2 | IGKC |
| clonotype3441 | CARGLGYSSSGYYYGMDVW     | IGHV4-34 | IGHJ6 | IGHM |                   |             |             | IGKV3-20  | IGKJ2 | IGKC |
| clonotype1296 | CARVVAAPDRGFDPW         | IGHV4-34 | IGHJ5 | IGHM |                   |             |             | IGKV3D-15 | IGKJ4 | IGKC |
| clonotype1145 | CARQEHVVVTAIGGFDPW      | IGHV4-34 | IGHJ5 | IGHM | IGLV2-14          | IGLJ3       | IGLC2       | IGKV3D-15 | IGKJ1 | IGKC |
| clonotype3672 | CARGGMITFGGVIVALSYFDLW  | IGHV4-34 | IGHJ2 | IGHM |                   |             |             | IGKV4-1   | IGKJ1 | IGKC |
| clonotype1476 | CARRIAAAAFDIW           | IGHV4-34 | IGHJ3 | IGHM |                   |             |             | IGKV4-1   | IGKJ4 | IGKC |
| clonotype1611 | CARGRYDFDYFDYW          | IGHV4-34 | IGHJ4 | IGHM |                   |             |             | IGKV4-1   | IGKJ2 | IGKC |
| clonotype594  | CASLSGPGFDYW            | IGHV4-34 | IGHJ4 | IGHM |                   |             |             | IGKV4-1   | IGKJ1 | IGKC |
| clonotype3073 | CARGSTVVVSTLNYW         | IGHV4-34 | IGHJ4 | IGHM | IGLV4-69          | IGLJ3       | IGLC2       | IGKV4-1   | IGKJ3 | IGKC |
| clonotype2246 | CARAAAAGTDGGWFDPW       | IGHV4-34 | IGHJ5 | IGHD |                   |             |             | IGKV4-1   | IGKJ1 | IGKC |
| clonotype2184 | CAKDRNGFDPW             | IGHV4-34 | IGHJ5 | IGHM |                   |             |             | IGKV4-1   | IGKJ2 | IGKC |
| clonotype518  | CASRYGDRPYYYGMDVW       | IGHV4-34 | IGHJ6 | IGHM |                   |             |             | IGKV4-1   | IGKJ3 | IGKC |
| clonotype802  | CARGRVLFDYW             | IGHV4-34 | IGHJ4 | IGHM |                   |             |             | IGKV6-21  | IGKJ1 | IGKC |
| clonotype155  | CANLPGQQLLETLYFQHW      | IGHV4-34 | IGHJ1 | IGHM | IGLV1-40          | IGLJ3       | IGLC2       |           |       |      |
| clonotype2429 | CARGGGQQLVVDAFDIW       | IGHV4-34 | IGHJ3 | IGHM | IGLV1-40          | IGLJ3       | IGLC2       |           |       |      |
| clonotype1569 | CARKCSSKRWLPNPGYFDYW    | IGHV4-34 | IGHJ4 | IGHM | IGLV1-40          | IGLJ2       | IGLC2       |           |       |      |
| clonotype3923 | CARIGTHYGDPTEYFYFDYW    | IGHV4-34 | IGHJ4 | IGHM | IGLV1-40          | IGLJ3       | IGLC2       |           |       |      |
| clonotype671  | CARGLGTAMATGGFDYW       | IGHV4-34 | IGHJ4 | IGHM | IGLV1-40          | IGLJ3       | IGLC2       |           |       |      |
| clonotype2525 | CARGRPEFSTWYFYFDYW      | IGHV4-34 | IGHJ4 | IGHM | IGLV1-40          | IGLJ1       | IGLC1       |           |       |      |
| clonotype2747 | CARLGRFVGATGVW          | IGHV4-34 | IGHJ4 | IGHM | IGLV1-40          | IGLJ3       | IGLC2       |           |       |      |
| clonotype3479 | CARGPVAAYYFYFDYW        | IGHV4-34 | IGHJ4 | IGHM | IGLV1-40          | IGLJ1       | IGLC1       |           |       |      |
| clonotype1747 | CARLTRSTYYYDSSGYYHFDYW  | IGHV4-34 | IGHJ4 | IGHM | IGLV1-40          | IGLJ1       | IGLC1       |           |       |      |
| clonotype3126 | CARGVSSSWGWFDPW         | IGHV4-34 | IGHJ5 | IGHM | IGLV1-40          | IGLJ3       | IGLC2       |           |       |      |
| clonotype3977 | CARGDSSSSVKWFDPW        | IGHV4-34 | IGHJ5 | IGHM | IGLV1-40          | IGLJ3       | IGLC2       |           |       |      |
| clonotype2758 | CARALDEYIVATTRGHWFDPW   | IGHV4-34 | IGHJ5 | IGHM | IGLV1-40          | IGLJ2       | IGLC2       |           |       |      |
| clonotype462  | CARGRSDGADTPRGRFDPW     | IGHV4-34 | IGHJ5 | IGHM | IGLV1-40          | IGLJ2       | IGLC2       |           |       |      |
| clonotype2846 | CARVRGSGITGTRYFYFDYW    | IGHV4-34 | IGHJ4 | IGHM | IGLV1-40;IGLV3-10 | IGLJ2;IGLJ3 | IGLC2;IGLC3 |           |       |      |
| clonotype2632 | CARASRGAVAGIRDW         | IGHV4-34 | IGHJ4 | IGHM | IGLV1-40;IGLV3-21 | IGLJ2;IGLJ3 | IGLC2;IGLC2 |           |       |      |
| clonotype2600 | CARAPLQQLAGDWYFDRW      | IGHV4-34 | IGHJ2 | IGHM | IGLV1-44          | IGLJ1       | IGLC1       |           |       |      |
| clonotype1728 | CASCERGGCSGYW           | IGHV4-34 | IGHJ4 | IGHM | IGLV1-44          | IGLJ2       | IGLC2       |           |       |      |
| clonotype1336 | CVRNGTKGLDSW            | IGHV4-34 | IGHJ4 | IGHM | IGLV1-44          | IGLJ3       | IGLC2       |           |       |      |
| clonotype3899 | CAPOGTGDPNYFYFDYW       | IGHV4-34 | IGHJ4 | IGHM | IGLV1-44          | IGLJ3       | IGLC2       |           |       |      |
| clonotype714  | CARRTDDSSGYFYFDYW       | IGHV4-34 | IGHJ4 | IGHM | IGLV1-44          | IGLJ7       | IGLC7       |           |       |      |
| clonotype1664 | CASDPPGRVGMVDVW         | IGHV4-34 | IGHJ6 | IGHD | IGLV1-44          | IGLJ1       | IGLC1       |           |       |      |
| clonotype363  | CARDRQQLALGYGMDVW       | IGHV4-34 | IGHJ6 | IGHM | IGLV1-44          | IGLJ1       | IGLC1       |           |       |      |

|               |                          |          |       |      |                   |             |             |  |  |
|---------------|--------------------------|----------|-------|------|-------------------|-------------|-------------|--|--|
| clonotype1421 | CARVVETTQTQHRYGMDVW      | IGHV4-34 | IGHJ6 | IGHM | IGLV1-44          | IGLJ1       | IGLC1       |  |  |
| clonotype475  | CARGIVVVAARDGFDIW        | IGHV4-34 | IGHJ3 | IGHM | IGLV1-47          | IGLJ3       | IGLC2       |  |  |
| clonotype2263 | CASLALRRPRITMVRGVDDAFDIW | IGHV4-34 | IGHJ3 | IGHM | IGLV1-47          | IGLJ1       | IGLC1       |  |  |
| clonotype2547 | CASLVTTDLPDFYW           | IGHV4-34 | IGHJ4 | IGHM | IGLV1-47          | IGLJ3       | IGLC2       |  |  |
| clonotype1112 | CARGGGMVRGGLTFDYW        | IGHV4-34 | IGHJ4 | IGHM | IGLV1-47;IGLV2-23 | IGLJ2;IGLJ2 | IGLC2;IGLC2 |  |  |
| clonotype2395 | CARRGEDSGDDCFDYW         | IGHV4-34 | IGHJ4 | IGHM | IGLV1-47;IGLV9-49 | IGLJ7;IGLJ3 | IGLC7;IGLC2 |  |  |
| clonotype1598 | CARALGVAAAGYWFDLW        | IGHV4-34 | IGHJ2 | IGHM | IGLV1-51          | IGLJ2       | IGLC2       |  |  |
| clonotype3713 | CAREMRQWLRWYFDLW         | IGHV4-34 | IGHJ2 | IGHM | IGLV1-51          | IGLJ3       | IGLC3       |  |  |
| clonotype3228 | CARWTMNYFDYW             | IGHV4-34 | IGHJ4 | IGHM | IGLV1-51          | IGLJ2       | IGLC2       |  |  |
| clonotype1509 | CAASIGGNSPRYW            | IGHV4-34 | IGHJ4 | IGHM | IGLV1-51          | IGLJ2       | IGLC2       |  |  |
| clonotype1391 | CARGLKTVWGSPGYW          | IGHV4-34 | IGHJ4 | IGHM | IGLV1-51          | IGLJ3       | IGLC3       |  |  |
| clonotype2318 | CARGYPLAATGTVGWFDPW      | IGHV4-34 | IGHJ5 | IGHD | IGLV1-51          | IGLJ3       | IGLC2       |  |  |
| clonotype3290 | CARGRRGYSSGSNWFDPW       | IGHV4-34 | IGHJ5 | IGHM | IGLV1-51          | IGLJ1       | IGLC1       |  |  |
| clonotype244  | CARLERGSITIFGGGYYYGMDVW  | IGHV4-34 | IGHJ6 | IGHM | IGLV1-51          | IGLJ3       | IGLC2       |  |  |
| clonotype3799 | CARASGGGEGPLGMDVW        | IGHV4-34 | IGHJ6 | IGHD | IGLV1-51          | IGLJ1       | IGLC1       |  |  |
| clonotype925  | CARGRSSSEGYYYYGMDVW      | IGHV4-34 | IGHJ6 | IGHM | IGLV1-51          | IGLJ2       | IGLC2       |  |  |
| clonotype3170 | CAAYSSGQKIDYW            | IGHV4-34 | IGHJ4 | IGHM | IGLV1-51;IGLV2-8  | IGLJ1;IGLJ1 | IGLC1;IGLC1 |  |  |
| clonotype2244 | CARPGEDW                 | IGHV4-34 | IGHJ4 | IGHM | IGLV10-54         | IGLJ3       | IGLC3       |  |  |
| clonotype1357 | CATLWNSSSWDKDYW          | IGHV4-34 | IGHJ4 | IGHM | IGLV2-11          | IGLJ1       | IGLC1       |  |  |
| clonotype809  | CARGRRQYDSSGYLQHW        | IGHV4-34 | IGHJ1 | IGHM | IGLV2-14          | IGLJ2       | IGLC2       |  |  |
| clonotype1584 | CARGAGRYSYRFWYFDLW       | IGHV4-34 | IGHJ2 | IGHM | IGLV2-14          | IGLJ3       | IGLC3       |  |  |
| clonotype2433 | CARNTVGATAFDIW           | IGHV4-34 | IGHJ3 | IGHM | IGLV2-14          | IGLJ3       | IGLC3       |  |  |
| clonotype693  | CARLVGGLRSSNPYFDYW       | IGHV4-34 | IGHJ4 | IGHM | IGLV2-14          | IGLJ2       | IGLC2       |  |  |
| clonotype2566 | CARGPTGRSNLGSDDSYSLDYW   | IGHV4-34 | IGHJ4 | IGHM | IGLV2-14          | IGLJ3       | IGLC3       |  |  |
| clonotype1432 | CARRGVDTAMATDFDYW        | IGHV4-34 | IGHJ4 | IGHM | IGLV2-14          | IGLJ1       | IGLC1       |  |  |
| clonotype2744 | CARGGFITGTTYFDYW         | IGHV4-34 | IGHJ4 | IGHM | IGLV2-14          | IGLJ1       | IGLC1       |  |  |
| clonotype3589 | CARGGTAAGTNDYW           | IGHV4-34 | IGHJ4 | IGHM | IGLV2-14          | IGLJ2       | IGLC2       |  |  |
| clonotype3203 | CARGVRFDDRLSLGHYFDYW     | IGHV4-34 | IGHJ4 | IGHM | IGLV2-14          | IGLJ2       | IGLC2       |  |  |
| clonotype2313 | CARGWGYSSGWYRGYFDYW      | IGHV4-34 | IGHJ4 | IGHM | IGLV2-14          | IGLJ1       | IGLC1       |  |  |
| clonotype2843 | CARTEVLLWFEFPNWFDPW      | IGHV4-34 | IGHJ5 | IGHM | IGLV2-14          | IGLJ2       | IGLC2       |  |  |
| clonotype3722 | CASWQLRDYYYGMDVW         | IGHV4-34 | IGHJ6 | IGHD | IGLV2-14          | IGLJ1       | IGLC1       |  |  |
| clonotype2197 | CARGPTLPLTIFYGMDVW       | IGHV4-34 | IGHJ6 | IGHM | IGLV2-14          | IGLJ3       | IGLC3       |  |  |
| clonotype2452 | CARGGAARLYGMDVW          | IGHV4-34 | IGHJ6 | IGHM | IGLV2-14          | IGLJ3       | IGLC2       |  |  |
| clonotype1312 | CARGRPMNNYYYYAMDVW       | IGHV4-34 | IGHJ6 | IGHM | IGLV2-14          | IGLJ2       | IGLC2       |  |  |
| clonotype1470 | CARGHPYCSGGSCDGDGMDVW    | IGHV4-34 | IGHJ6 | IGHM | IGLV2-14          | IGLJ3       | IGLC3       |  |  |
| clonotype4076 | CARGRGRITMVRGVSDYGMVW    | IGHV4-34 | IGHJ6 | IGHM | IGLV2-14          | IGLJ2       | IGLC2       |  |  |
| clonotype3004 | CARGRDDSSGYAAEVDVW       | IGHV4-34 | IGHJ6 | IGHM | IGLV2-14          | IGLJ3       | IGLC3       |  |  |
| clonotype2931 | CARGPPTVTTGFDPW          | IGHV4-34 | IGHJ5 | IGHM | IGLV2-14;IGLV6-57 | IGLJ3;IGLJ1 | IGLC2;IGLC1 |  |  |
| clonotype1212 | CAREPRGVAVDYW            | IGHV4-34 | IGHJ4 | IGHM | IGLV2-14;IGLV7-43 | IGLJ3;IGLJ3 | IGLC2;IGLC3 |  |  |
| clonotype2013 | CARRRESSRYFDLW           | IGHV4-34 | IGHJ2 | IGHM | IGLV2-23          | IGLJ3       | IGLC2       |  |  |
| clonotype3748 | CARKSRRLPPRWYFDLW        | IGHV4-34 | IGHJ2 | IGHM | IGLV2-23          | IGLJ3       | IGLC2       |  |  |
| clonotype1762 | CARGSPYSSGWLKSRTWPYFDYW  | IGHV4-34 | IGHJ4 | IGHD | IGLV2-23          | IGLJ3       | IGLC3       |  |  |
| clonotype924  | CASRGDSVKLYGGGRGWFDPW    | IGHV4-34 | IGHJ5 | IGHM | IGLV2-23          | IGLJ3       | IGLC2       |  |  |
| clonotype2054 | CARGGSSSWYGEHW           | IGHV4-34 | IGHJ1 | IGHM | IGLV2-8           | IGLJ2       | IGLC2       |  |  |
| clonotype2735 | CARGSGVVVVVPAAFDIW       | IGHV4-34 | IGHJ3 | IGHM | IGLV2-8           | IGLJ3       | IGLC3       |  |  |
| clonotype2218 | CARLGLLNDYVVGARAQGAFDIW  | IGHV4-34 | IGHJ3 | IGHM | IGLV2-8           | IGLJ2       | IGLC2       |  |  |
| clonotype1083 | CARNNGRGYGYYYGMDVW       | IGHV4-34 | IGHJ6 | IGHM | IGLV2-8           | IGLJ1       | IGLC1       |  |  |
| clonotype2495 | CGRGSQVFRTRYGMDVW        | IGHV4-34 | IGHJ6 | IGHM | IGLV2-8           | IGLJ2       | IGLC2       |  |  |
| clonotype1675 | CARLANWGSGLDYW           | IGHV4-34 | IGHJ4 | IGHM | IGLV2-8;IGLV6-57  | IGLJ1;IGLJ3 | IGLC1;IGLC2 |  |  |
| clonotype641  | CARGGITGTTEYFDYW         | IGHV4-34 | IGHJ4 | IGHM | IGLV3-1           | IGLJ2       | IGLC2       |  |  |
| clonotype3801 | CARLQVRARSDRGYYYGSGSYDYW | IGHV4-34 | IGHJ4 | IGHM | IGLV3-10          | IGLJ2       | IGLC2       |  |  |
| clonotype3687 | CARGDNTYYYGSGAPDYW       | IGHV4-34 | IGHJ4 | IGHM | IGLV3-10          | IGLJ3       | IGLC2       |  |  |
| clonotype2954 | CARGPVVVITNDAFDIW        | IGHV4-34 | IGHJ3 | IGHM | IGLV3-19          | IGLJ3       | IGLC3       |  |  |
| clonotype911  | CARGYNTAAAGIDYW          | IGHV4-34 | IGHJ4 | IGHM | IGLV3-19          | IGLJ2       | IGLC2       |  |  |



|  |               |                          |          |       |      |          |       |       |  |  |
|--|---------------|--------------------------|----------|-------|------|----------|-------|-------|--|--|
|  | clonotype1841 | CARGLLAVAPTGFYW          | IGHV4-34 | IGHJ4 | IGHM | IGLV3-19 | IGLJ1 | IGLC1 |  |  |
|  | clonotype1758 | CARVPSYSSSFFDYW          | IGHV4-34 | IGHJ4 | IGHM | IGLV3-19 | IGLJ2 | IGLC2 |  |  |
|  | clonotype2840 | CARGYVLEEGTVIQLWLGYYFDYW | IGHV4-34 | IGHJ4 | IGHM | IGLV3-19 | IGLJ1 | IGLC1 |  |  |
|  | clonotype1454 | CARGRVAAAEYYFDYW         | IGHV4-34 | IGHJ4 | IGHM | IGLV3-19 | IGLJ2 | IGLC2 |  |  |
|  | clonotype1224 | CARGSLLYYDFWSSGLFDYW     | IGHV4-34 | IGHJ4 | IGHM | IGLV3-19 | IGLJ2 | IGLC2 |  |  |
|  | clonotype4117 | CARRFPAGIAVAGTGDPFDYW    | IGHV4-34 | IGHJ4 | IGHM | IGLV3-19 | IGLJ3 | IGLC3 |  |  |
|  | clonotype3802 | CARGYSGSYEGGDAFDIW       | IGHV4-34 | IGHJ3 | IGHM | IGLV3-25 | IGLJ2 | IGLC2 |  |  |
|  | clonotype1069 | CARAQSRSGSYIRGFDYW       | IGHV4-34 | IGHJ4 | IGHM | IGLV3-25 | IGLJ2 | IGLC2 |  |  |
|  | clonotype976  | CARVNDPYGGNSRGVDYW       | IGHV4-34 | IGHJ4 | IGHM | IGLV3-9  | IGLJ2 | IGLC2 |  |  |
|  | clonotype194  | CARGRSRWLSNGGGDYW        | IGHV4-34 | IGHJ4 | IGHM | IGLV7-43 | IGLJ3 | IGLC3 |  |  |
|  | clonotype11   | CASAGRPEYSYGWNW          | IGHV4-34 | IGHJ4 | IGHM | IGLV7-43 | IGLJ3 | IGLC2 |  |  |
|  | clonotype4111 | CARGPNYYDSSGSLGYW        | IGHV4-34 | IGHJ4 | IGHM | IGLV7-43 | IGLJ3 | IGLC3 |  |  |
|  | clonotype885  | CARGPSRWGDDILTGRPFDIW    | IGHV4-34 | IGHJ3 | IGHM | IGLV7-46 | IGLJ3 | IGLC3 |  |  |

| Sample | clonotype_id  | igh_cdr3s                  | igh_v-genes | igh_j | igh_c | igl_v-genes | igl_j | igl_c | igk_v_genes        | igk_j       | igk_c     |
|--------|---------------|----------------------------|-------------|-------|-------|-------------|-------|-------|--------------------|-------------|-----------|
| HC-07  | clonotype1744 | CATPQGSSGLGDAFDIW          | IGHV4-34    | IGHJ3 | IGHM  |             |       |       | IGKV1-5            | IGKJ2       | IGKC      |
|        | clonotype3110 | CARGVPAAPFDYW              | IGHV4-34    | IGHJ4 | IGHM  |             |       |       | IGKV1-5            | IGKJ2       | IGKC      |
|        | clonotype3081 | CARTGSSWTSIVDYW            | IGHV4-34    | IGHJ4 | IGHM  |             |       |       | IGKV1-5            | IGKJ2       | IGKC      |
|        | clonotype2900 | CARGSIAAAYYYMDVW           | IGHV4-34    | IGHJ6 | IGHD  |             |       |       | IGKV1-5            | IGKJ4       | IGKC      |
|        | clonotype3324 | CARDRGSMTTVTTSWFDPW        | IGHV4-34    | IGHJ5 | IGHM  |             |       |       | IGKV1-6            | IGKJ3       | IGKC      |
|        | clonotype3269 | CARGRSSWVNAFDIW            | IGHV4-34    | IGHJ3 | IGHM  |             |       |       | IGKV1-8            | IGKJ1       | IGKC      |
|        | clonotype2804 | CARGRYSGYSLSGYFDYW         | IGHV4-34    | IGHJ4 | IGHM  |             |       |       | IGKV1-8            | IGKJ1       | IGKC      |
|        | clonotype672  | CARGPLLWGSSTSCYTGYFDYW     | IGHV4-34    | IGHJ4 | IGHM  |             |       |       | IGKV1-8            | IGKJ1       | IGKC      |
|        | clonotype2131 | CARGYSGSYYSFDYW            | IGHV4-34    | IGHJ4 | IGHM  |             |       |       | IGKV1-8            | IGKJ1       | IGKC      |
|        | clonotype2058 | CASGFYGGNKRKLGDDGYW        | IGHV4-34    | IGHJ4 | IGHM  |             |       |       | IGKV1-9            | IGKJ5       | IGKC      |
|        | clonotype3292 | CAREGLELLPHYMDVW           | IGHV4-34    | IGHJ6 | IGHM  |             |       |       | IGKV1-9            | IGKJ1       | IGKC      |
|        | clonotype2297 | CARGRICGYVCSYYMDVW         | IGHV4-34    | IGHJ6 | IGHM  |             |       |       | IGKV1-12           | IGKJ5       | IGKC      |
|        | clonotype2266 | CARGGGEQLVLPDYW            | IGHV4-34    | IGHJ4 | IGHM  |             |       |       | IGKV1-17           | IGKJ2       | IGKC      |
|        | clonotype2668 | CARGLSVAARHRLGAFPYW        | IGHV4-34    | IGHJ4 | IGHM  |             |       |       | IGKV1-27           | IGKJ1       | IGKC      |
|        | clonotype2858 | CARGGFWSGYFFW              | IGHV4-34    | IGHJ4 | IGHM  |             |       |       | IGKV1-27           | IGKJ1       | IGKC      |
|        | clonotype3016 | CARVGVPAANW                | IGHV4-34    | IGHJ4 | IGHM  |             |       |       | IGKV1-33           | IGKJ1       | IGKC      |
|        | clonotype279  | CARGHRVDFWSGYYPHLGSAWDPW   | IGHV4-34    | IGHJ5 | IGHM  |             |       |       | IGKV1-33           | IGKJ2       | IGKC      |
|        | clonotype2991 | CARGSGFRELSLGYW            | IGHV4-34    | IGHJ4 | IGHM  |             |       |       | IGKV1D-8           | IGKJ2       | IGKC      |
|        | clonotype2682 | CARARAFWSGYSPITGYYYMDVW    | IGHV4-34    | IGHJ6 | IGHM  |             |       |       | IGKV1D-8           | IGKJ4       | IGKC      |
|        | clonotype2960 | CARGKYSSSLYYYYMDVW         | IGHV4-34    | IGHJ6 | IGHD  |             |       |       | IGKV1D-13          | IGKJ1       | IGKC      |
|        | clonotype901  | CARGRGEVVPAAAPFDYW         | IGHV4-34    | IGHJ4 | IGHM  |             |       |       | IGKV1D-17          | IGKJ3       | IGKC      |
|        | clonotype1612 | CARGNQLEIVVPGRRGAFDIW      | IGHV4-34    | IGHJ3 | IGHM  |             |       |       | IGKV1D-39          | IGKJ2       | IGKC      |
|        | clonotype2233 | CARGGFDFWSGYVGYHDAFDIW     | IGHV4-34    | IGHJ3 | IGHM  |             |       |       | IGKV1D-39          | IGKJ2       | IGKC      |
|        | clonotype449  | CARRRVWFREFLDYW            | IGHV4-34    | IGHJ4 | IGHM  |             |       |       | IGKV1D-39          | IGKJ3       | IGKC      |
|        | clonotype2198 | CARVPLRLSTRPYYYYGMDVW      | IGHV4-34    | IGHJ6 | IGHM  | IGLV1-47    | IGLJ2 | IGLC2 | IGKV1D-39          | IGKJ2       | IGKC      |
|        | clonotype1221 | CARGLSRWISSRGETRRNRTRGWDPW | IGHV4-34    | IGHJ5 | IGHD  |             |       |       | IGKV1D-39          | IGKJ4       | IGKC      |
|        | clonotype293  | CARLDYERGYALGYLDVW         | IGHV4-34    | IGHJ6 | IGHD  |             |       |       | IGKV1D-39          | IGKJ1       | IGKC      |
|        | clonotype3076 | CAREAGRQLWLRGYGYW          | IGHV4-34    | IGHJ4 | IGHM  |             |       |       | IGKV2-28           | IGKJ1       | IGKC      |
|        | clonotype2469 | CAVRAVIAAAGTRWDPW          | IGHV4-34    | IGHJ5 | IGHM  |             |       |       | IGKV2-28           | IGKJ1       | IGKC      |
|        | clonotype605  | CARGPRVENYYDSSGQYYYYGMDVW  | IGHV4-34    | IGHJ6 | IGHM  |             |       |       | IGKV2-28           | IGKJ2       | IGKC      |
|        | clonotype2450 | CAREENYITMVQGSVLRGWDPW     | IGHV4-34    | IGHJ5 | IGHD  |             |       |       | IGKV2-28           | IGKJ2       | IGKC      |
|        | clonotype2673 | CARGDRVLVYAIRAGWYFDYW      | IGHV4-34    | IGHJ4 | IGHM  |             |       |       | IGKV2D-29;IGKV3-11 | IGKJ3;IGKJ4 | IGKC;IGKC |
|        | clonotype614  | CARGHGPPGYW                | IGHV4-34    | IGHJ4 | IGHM  |             |       |       | IGKV3-11           | IGKJ5       | IGKC      |
|        | clonotype623  | CARGGQQLVPQRFDYW           | IGHV4-34    | IGHJ4 | IGHD  |             |       |       | IGKV3-11           | IGKJ3       | IGKC      |
|        | clonotype1811 | CARERLSTAGHDYFYYMDVW       | IGHV4-34    | IGHJ6 | IGHM  |             |       |       | IGKV3-11;IGKV3-15  | IGKJ5;IGKJ1 | IGKC;IGKC |
|        | clonotype488  | CARGLTAPSRPSSYSSSWYRSYW    | IGHV4-34    | IGHJ4 | IGHM  |             |       |       | IGKV3-15           | IGKJ1       | IGKC      |
|        | clonotype881  | CARGKNYYYYMDVW             | IGHV4-34    | IGHJ6 | IGHM  |             |       |       | IGKV3-15           | IGKJ4       | IGKC      |
|        | clonotype3140 | CAVRLVTSNIRYYYYGMDVW       | IGHV4-34    | IGHJ6 | IGHM  |             |       |       | IGKV3-15           | IGKJ1       | IGKC      |

|  |               |                            |          |       |      |                   |             |             |          |       |      |
|--|---------------|----------------------------|----------|-------|------|-------------------|-------------|-------------|----------|-------|------|
|  | clonotype2089 | CARGLRT                    | IGHV4-34 | IGHJ6 | IGHM |                   |             |             | IGKV3-15 | IGKJ2 | IGKC |
|  | clonotype1043 | CARVLRRLRWFYDW             | IGHV4-34 | IGHJ4 | IGHM |                   |             |             | IGKV3-20 | IGKJ2 | IGKC |
|  | clonotype143  | CARGPSKISYYYYMDVW          | IGHV4-34 | IGHJ6 | IGHM |                   |             |             | IGKV3-20 | IGKJ2 | IGKC |
|  | clonotype2313 | CARGTFSGYDYWDYW            | IGHV4-34 | IGHJ4 | IGHM |                   |             |             | IGKV4-1  | IGKJ4 | IGKC |
|  | clonotype1416 | CARGTYSGYDYWDYW            | IGHV4-34 | IGHJ4 | IGHM |                   |             |             | IGKV4-1  | IGKJ4 | IGKC |
|  | clonotype657  | CARGLVSGTNMGPFYDW          | IGHV4-34 | IGHJ4 | IGHM |                   |             |             | IGKV4-1  | IGKJ2 | IGKC |
|  | clonotype2921 | CARGRKAIPKYNWFDPW          | IGHV4-34 | IGHJ5 | IGHM |                   |             |             | IGKV4-1  | IGKJ1 | IGKC |
|  | clonotype3182 | CARVLTGLMPYYMDVW           | IGHV4-34 | IGHJ6 | IGHM |                   |             |             | IGKV4-1  | IGKJ2 | IGKC |
|  | clonotype1116 | CARVGAGTDYW                | IGHV4-34 | IGHJ4 | IGHD |                   |             |             | IGKV4-1  | IGKJ4 | IGKC |
|  | clonotype2962 | CARVGSWYSGSYPFYDW          | IGHV4-34 | IGHJ4 | IGHM | IGLV1-40          | IGLJ2       | IGLC2       |          |       |      |
|  | clonotype936  | CARHPYDFWWSGYPIHPRYNWFDPW  | IGHV4-34 | IGHJ5 | IGHM | IGLV1-40          | IGLJ2       | IGLC2       |          |       |      |
|  | clonotype2294 | CARGLGATSAFDYW             | IGHV4-34 | IGHJ4 | IGHM | IGLV1-44          | IGLJ2       | IGLC2       |          |       |      |
|  | clonotype1836 | CARVIFCCAPRYADSYFQHW       | IGHV4-34 | IGHJ1 | IGHM | IGLV1-47          | IGLJ3       | IGLC3       |          |       |      |
|  | clonotype3127 | CARDQPPKLFYDW              | IGHV4-34 | IGHJ4 | IGHM | IGLV1-47          | IGLJ1       | IGLC1       |          |       |      |
|  | clonotype768  | CARRGVLGYCSGSCSTYYGMDVW    | IGHV4-34 | IGHJ6 | IGHM | IGLV1-47          | IGLJ2       | IGLC2       |          |       |      |
|  | clonotype2909 | CASRAYYSGSYFPKTFGYYYYGMDVW | IGHV4-34 | IGHJ6 | IGHM | IGLV1-47          | IGLJ2       | IGLC2       |          |       |      |
|  | clonotype1535 | CARFLGGVISLDYW             | IGHV4-34 | IGHJ4 | IGHM | IGLV1-47;IGLV2-23 | IGLJ2;IGLJ2 | IGLC2;IGLC2 |          |       |      |
|  | clonotype1919 | CARRGPRGRPWLHRNWFDPW       | IGHV4-34 | IGHJ5 | IGHM | IGLV1-51          | IGLJ3       | IGLC3       |          |       |      |
|  | clonotype1030 | CARVVRDLMRTYYYMDVW         | IGHV4-34 | IGHJ6 | IGHM | IGLV1-51          | IGLJ2       | IGLC2       |          |       |      |
|  | clonotype1142 | CARGPYSSSTPWRAFYDW         | IGHV4-34 | IGHJ4 | IGHM | IGLV1-51;IGLV6-57 | IGLJ2;IGLJ2 | IGLC2;IGLC2 |          |       |      |
|  | clonotype2712 | CARAQLRFKFDYW              | IGHV4-34 | IGHJ4 | IGHM | IGLV2-11          | IGLJ1       | IGLC1       |          |       |      |
|  | clonotype3315 | CARTPFLGGWFDPW             | IGHV4-34 | IGHJ5 | IGHM | IGLV2-11          | IGLJ1       | IGLC1       |          |       |      |
|  | clonotype933  | CARALTFSSSGHRLDWHFDLW      | IGHV4-34 | IGHJ2 | IGHM | IGLV2-14          | IGLJ2       | IGLC2       |          |       |      |
|  | clonotype1204 | CARGRFWSGFLW               | IGHV4-34 | IGHJ4 | IGHM | IGLV2-14          | IGLJ2       | IGLC2       |          |       |      |
|  | clonotype25   | CARGSIVVPAAIIGVSAFDPW      | IGHV4-34 | IGHJ5 | IGHM | IGLV2-14          | IGLJ3       | IGLC3       |          |       |      |
|  | clonotype2461 | CARGRITIFGVASHNWFDPW       | IGHV4-34 | IGHJ5 | IGHM | IGLV2-14          | IGLJ2       | IGLC2       |          |       |      |
|  | clonotype2742 | CARADPYYPGVGRVRFDPW        | IGHV4-34 | IGHJ5 | IGHM | IGLV3-1           | IGLJ2       | IGLC2       |          |       |      |
|  | clonotype74   | CARGPLCSSTSCYPYSGMDVW      | IGHV4-34 | IGHJ6 | IGHD | IGLV3-1           | IGLJ2       | IGLC2       |          |       |      |
|  | clonotype2397 | CARAHTLTTVTTRELDYW         | IGHV4-34 | IGHJ4 | IGHM | IGLV3-19          | IGLJ2       | IGLC2       |          |       |      |
|  | clonotype1034 | CARGPGYSYDFYPNW            | IGHV4-34 | IGHJ4 | IGHM | IGLV3-19          | IGLJ2       | IGLC3       |          |       |      |
|  | clonotype1911 | CARGLYSGSYWGKGRFDPW        | IGHV4-34 | IGHJ5 | IGHM | IGLV3-19          | IGLJ2       | IGLC2       |          |       |      |
|  | clonotype1496 | CARVSVVVPALSDPW            | IGHV4-34 | IGHJ5 | IGHM | IGLV3-19          | IGLJ2       | IGLC2       |          |       |      |
|  | clonotype1865 | CARGLNDYGDYDYGGMDVW        | IGHV4-34 | IGHJ6 | IGHD | IGLV3-25          | IGLJ3       | IGLC3       |          |       |      |

| Sample | clonotype_id  | igh_cdr3s                   | igh_v-genes | igh_j | igh_c | igl_v-genes | igl_j | igl_c | igk_v_genes      | igk_j       | igk_c     |
|--------|---------------|-----------------------------|-------------|-------|-------|-------------|-------|-------|------------------|-------------|-----------|
| HC-15  | clonotype2434 | CARERELLRGDAFDIW            | IGHV4-34    | IGHJ3 | IGHM  |             |       |       | IGKV1-5          | IGKJ1       | IGKC      |
|        | clonotype3110 | CARGHVRKRGGSGSYKFFPDYW      | IGHV4-34    | IGHJ4 | IGHM  |             |       |       | IGKV1-5          | IGKJ1       | IGKC      |
|        | clonotype297  | CARGFWSKGRKRAILFDYW         | IGHV4-34    | IGHJ4 | IGHM  |             |       |       | IGKV1-5          | IGKJ4       | IGKC      |
|        | clonotype2251 | CARGGYSGLYAPLRGW            | IGHV4-34    | IGHJ4 | IGHM  |             |       |       | IGKV1-5          | IGKJ1       | IGKC      |
|        | clonotype285  | CAGGGKILPFYDW               | IGHV4-34    | IGHJ4 | IGHM  |             |       |       | IGKV1-5          | IGKJ1       | IGKC      |
|        | clonotype3198 | CARGLRVVGSYFMFLGAYYFDYW     | IGHV4-34    | IGHJ4 | IGHM  |             |       |       | IGKV1-5          | IGKJ1       | IGKC      |
|        | clonotype947  | CARGYFWLMAVAGYYFDYW         | IGHV4-34    | IGHJ4 | IGHM  |             |       |       | IGKV1-5          | IGKJ1       | IGKC      |
|        | clonotype320  | CARLRPYSGSYNLKYYFDYW        | IGHV4-34    | IGHJ4 | IGHM  |             |       |       | IGKV1-5          | IGKJ1       | IGKC      |
|        | clonotype5348 | CARGLITFGGVIAPIDYW          | IGHV4-34    | IGHJ4 | IGHM  |             |       |       | IGKV1-5          | IGKJ2       | IGKC      |
|        | clonotype3346 | CARGPLRREGPPRGYSKPW         | IGHV4-34    | IGHJ5 | IGHM  |             |       |       | IGKV1-5          | IGKJ2       | IGKC      |
|        | clonotype4683 | CARQNDSEYYYYGMDVW           | IGHV4-34    | IGHJ6 | IGHM  |             |       |       | IGKV1-5          | IGKJ2       | IGKC      |
|        | clonotype4444 | CAREHRSLYCSSTSCYRPPYGGMDVW  | IGHV4-34    | IGHJ6 | IGHM  |             |       |       | IGKV1-5          | IGKJ4       | IGKC      |
|        | clonotype299  | CARRYSLYYFDYW               | IGHV4-34    | IGHJ4 | IGHM  |             |       |       | IGKV1-5;IGKV3-11 | IGKJ1;IGKJ5 | IGKC;IGKC |
|        | clonotype32   | CARGRLRTARVEYFQHW           | IGHV4-34    | IGHJ1 | IGHM  |             |       |       | IGKV1-6          | IGKJ1       | IGKC      |
|        | clonotype3652 | CARKAGHRRITVAANYYYGMDVW     | IGHV4-34    | IGHJ6 | IGHM  |             |       |       | IGKV1-6          | IGKJ2       | IGKC      |
|        | clonotype4088 | CASGLRNWVNDVSSRFDPW         | IGHV4-34    | IGHJ5 | IGHM  |             |       |       | IGKV1-8          | IGKJ4       | IGKC      |
|        | clonotype1632 | CARGDYSGSLIWSGWFDPW         | IGHV4-34    | IGHJ5 | IGHM  |             |       |       | IGKV1-8          | IGKJ1       | IGKC      |
|        | clonotype65   | CASLPRYSYGYGVPNYGMDVW       | IGHV4-34    | IGHJ6 | IGHM  |             |       |       | IGKV1-8          | IGKJ4       | IGKC      |
|        | clonotype64   | CARDPRKDGYCSSTSCPKYYYYGMDVW | IGHV4-34    | IGHJ6 | IGHM  |             |       |       | IGKV1-8          | IGKJ1       | IGKC      |

|               |                           |          |       |      |          |       |       |                   |             |           |
|---------------|---------------------------|----------|-------|------|----------|-------|-------|-------------------|-------------|-----------|
| clonotype2147 | CARFRYCSSTSCYTRWDYYYGMDVW | IGHV4-34 | IGHJ6 | IGHM |          |       |       | IGKV1-8           | IGKJ4       | IGKC      |
| clonotype2114 | CARTPNIIARPFDYW           | IGHV4-34 | IGHJ4 | IGHM |          |       |       | IGKV1-12          | IGKJ1       | IGKC      |
| clonotype1986 | CARGTVTEDYW               | IGHV4-34 | IGHJ4 | IGHM |          |       |       | IGKV1-16          | IGKJ1       | IGKC      |
| clonotype243  | CARGYYTVTSAYW             | IGHV4-34 | IGHJ4 | IGHM |          |       |       | IGKV1-16          | IGKJ2       | IGKC      |
| clonotype4584 | CARLPWLVRYYFDYW           | IGHV4-34 | IGHJ4 | IGHM |          |       |       | IGKV1-17          | IGKJ1       | IGKC      |
| clonotype122  | CARSPTGLRDYW              | IGHV4-34 | IGHJ4 | IGHM |          |       |       | IGKV1-17          | IGKJ2       | IGKC      |
| clonotype4656 | CARGLGSKDYW               | IGHV4-34 | IGHJ4 | IGHM |          |       |       | IGKV1-17          | IGKJ1       | IGKC      |
| clonotype622  | CARGSSWLPVNW              | IGHV4-34 | IGHJ4 | IGHM |          |       |       | IGKV1-17          | IGKJ4       | IGKC      |
| clonotype3514 | CARGRSYGSGSYDYW           | IGHV4-34 | IGHJ4 | IGHM |          |       |       | IGKV1-17          | IGKJ1       | IGKC      |
| clonotype5128 | CARVSKWVAVYGFDPW          | IGHV4-34 | IGHJ5 | IGHM |          |       |       | IGKV1-17          | IGKJ1       | IGKC      |
| clonotype797  | CARGGLSGTIIAARPGGMDVW     | IGHV4-34 | IGHJ6 | IGHM |          |       |       | IGKV1-17          | IGKJ2       | IGKC      |
| clonotype2938 | CARMSRIQLWLEANYFFYYGMDVW  | IGHV4-34 | IGHJ6 | IGHM |          |       |       | IGKV1-17          | IGKJ1       | IGKC      |
| clonotype3302 | CARVGGSGSYQGFFHYYYGMDVW   | IGHV4-34 | IGHJ6 | IGHM |          |       |       | IGKV1-17          | IGKJ3       | IGKC      |
| clonotype3357 | CARGPSRPRGVVVVPAAYNAFDIW  | IGHV4-34 | IGHJ3 | IGHM |          |       |       | IGKV1-27          | IGKJ4       | IGKC      |
| clonotype5205 | CARAAGYDSSQW              | IGHV4-34 | IGHJ4 | IGHM |          |       |       | IGKV1-27          | IGKJ1       | IGKC      |
| clonotype865  | CARGGRGLLRSPVYW           | IGHV4-34 | IGHJ4 | IGHM |          |       |       | IGKV1-27          | IGKJ4       | IGKC      |
| clonotype2897 | CASRRSGYSGYW              | IGHV4-34 | IGHJ4 | IGHM |          |       |       | IGKV1-27          | IGKJ1       | IGKC      |
| clonotype4040 | CAWGFYDILTGPLDAFDIW       | IGHV4-34 | IGHJ3 | IGHM |          |       |       | IGKV1D-39         | IGKJ1       | IGKC      |
| clonotype473  | CARSSAGGTTVFW             | IGHV4-34 | IGHJ4 | IGHM |          |       |       | IGKV1D-39         | IGKJ1       | IGKC      |
| clonotype1398 | CARVRLLRKTAMVIYFDYW       | IGHV4-34 | IGHJ4 | IGHM |          |       |       | IGKV1D-39         | IGKJ2       | IGKC      |
| clonotype5033 | CARGVARRYDRLHDYW          | IGHV4-34 | IGHJ4 | IGHM |          |       |       | IGKV1D-39         | IGKJ1       | IGKC      |
| clonotype3753 | CARRPRRDYKFRDYFDYW        | IGHV4-34 | IGHJ4 | IGHM |          |       |       | IGKV1D-39         | IGKJ2       | IGKC      |
| clonotype1894 | CARVPRFVYSSSLYFDYW        | IGHV4-34 | IGHJ4 | IGHM |          |       |       | IGKV1D-39         | IGKJ2       | IGKC      |
| clonotype1572 | CARGRCYCSSTSCYTGHDRTYFDYW | IGHV4-34 | IGHJ4 | IGHM |          |       |       | IGKV1D-39         | IGKJ1       | IGKC      |
| clonotype5374 | CARPLYYDSSGYSYGW          | IGHV4-34 | IGHJ4 | IGHM |          |       |       | IGKV1D-39         | IGKJ2       | IGKC      |
| clonotype864  | CARDNYDFWSGYTSGYDYW       | IGHV4-34 | IGHJ4 | IGHM |          |       |       | IGKV1D-39         | IGKJ4       | IGKC      |
| clonotype3445 | CARGRAGNSGKRFDPW          | IGHV4-34 | IGHJ5 | IGHM |          |       |       | IGKV1D-39         | IGKJ2       | IGKC      |
| clonotype2430 | CARIRCSGSGCYPSWFDPW       | IGHV4-34 | IGHJ5 | IGHM |          |       |       | IGKV1D-39         | IGKJ2       | IGKC      |
| clonotype2544 | CARVQTYKQVMRTKNWFDPW      | IGHV4-34 | IGHJ5 | IGHM |          |       |       | IGKV1D-39         | IGKJ1       | IGKC      |
| clonotype446  | CARGRVAPVTFDPW            | IGHV4-34 | IGHJ5 | IGHM |          |       |       | IGKV1D-39         | IGKJ5       | IGKC      |
| clonotype2321 | CARGQDLRIFGAYYYYYYGMVW    | IGHV4-34 | IGHJ6 | IGHM |          |       |       | IGKV1D-39         | IGKJ4       | IGKC      |
| clonotype5048 | CARVGFLEWLSDDHYYYGMVW     | IGHV4-34 | IGHJ6 | IGHM |          |       |       | IGKV1D-39         | IGKJ2       | IGKC      |
| clonotype4446 | CARGQYDFWSGYYPDYYYYYYGMVW | IGHV4-34 | IGHJ6 | IGHM |          |       |       | IGKV1D-39         | IGKJ3       | IGKC      |
| clonotype3639 | CARGDDFWSGYYLYWYFDLW      | IGHV4-34 | IGHJ2 | IGHM |          |       |       | IGKV1D-39;IGKV4-1 | IGKJ4;IGKJ2 | IGKC;IGKC |
| clonotype1288 | CARGRRARTHFYDW            | IGHV4-34 | IGHJ4 | IGHM | IGLV2-14 | IGLJ1 | IGLC1 | IGKV1D-43         | IGKJ4       | IGKC      |
| clonotype1038 | CAFRTQKWNDFDYW            | IGHV4-34 | IGHJ4 | IGHM |          |       |       | IGKV1D-8          | IGKJ1       | IGKC      |
| clonotype1221 | CARGLPGYGSGLTFSYW         | IGHV4-34 | IGHJ4 | IGHM |          |       |       | IGKV2-24          | IGKJ5       | IGKC      |
| clonotype2806 | CARSQRWLQVGHGFQHW         | IGHV4-34 | IGHJ1 | IGHM |          |       |       | IGKV2-28          | IGKJ5       | IGKC      |
| clonotype3386 | CARGLYCSSTSCYPYGFDPW      | IGHV4-34 | IGHJ5 | IGHM |          |       |       | IGKV2-28          | IGKJ2       | IGKC      |
| clonotype337  | CARVRVAAAYSRPYYYYGMDVW    | IGHV4-34 | IGHJ6 | IGHM |          |       |       | IGKV2-28          | IGKJ2       | IGKC      |
| clonotype5366 | CARGSGYDFWSGYTNYYYGMDVW   | IGHV4-34 | IGHJ6 | IGHM |          |       |       | IGKV2-30          | IGKJ1       | IGKC      |
| clonotype5338 | CARLKGRYSPAFVYW           | IGHV4-34 | IGHJ4 | IGHM |          |       |       | IGKV2-30;IGKV4-1  | IGKJ4;IGKJ4 | IGKC;IGKC |
| clonotype3160 | CAGPNWNYASDDAFDIW         | IGHV4-34 | IGHJ3 | IGHM |          |       |       | IGKV3-11          | IGKJ2       | IGKC      |
| clonotype3050 | CARGLWLRGLGYFDYW          | IGHV4-34 | IGHJ4 | IGHM |          |       |       | IGKV3-11          | IGKJ4       | IGKC      |
| clonotype3591 | CARGDSTYGPYYYGSGSYGTYW    | IGHV4-34 | IGHJ4 | IGHM |          |       |       | IGKV3-11          | IGKJ2       | IGKC      |
| clonotype2323 | CARRALLQRGIVVVTKNWFDPW    | IGHV4-34 | IGHJ5 | IGHM |          |       |       | IGKV3-11          | IGKJ2       | IGKC      |
| clonotype3778 | CARVLFRRSYGSGSYRPGANWFDPW | IGHV4-34 | IGHJ5 | IGHM |          |       |       | IGKV3-11          | IGKJ1       | IGKC      |
| clonotype4256 | CARGKRAYDFWS              | IGHV4-34 | IGHJ1 | IGHM |          |       |       | IGKV3-15          | IGKJ2       | IGKC      |
| clonotype4682 | CASVWFLAFDIW              | IGHV4-34 | IGHJ3 | IGHM |          |       |       | IGKV3-15          | IGKJ5       | IGKC      |
| clonotype3489 | CARPRRKHPLDSSGFFDYW       | IGHV4-34 | IGHJ4 | IGHM |          |       |       | IGKV3-15          | IGKJ2       | IGKC      |
| clonotype2846 | CARRLYSSGWTSRFYFDYW       | IGHV4-34 | IGHJ4 | IGHM |          |       |       | IGKV3-15          | IGKJ2       | IGKC      |
| clonotype2582 | CARSPRYCASSCYKALDYW       | IGHV4-34 | IGHJ4 | IGHM |          |       |       | IGKV3-15          | IGKJ2       | IGKC      |
| clonotype4193 | CAKRYGSGSYWLWPFYDW        | IGHV4-34 | IGHJ4 | IGHM |          |       |       | IGKV3-15          | IGKJ2       | IGKC      |
| clonotype2563 | CARSKITMVRGVIITSYFDYW     | IGHV4-34 | IGHJ4 | IGHM |          |       |       | IGKV3-15          | IGKJ4       | IGKC      |

|               |                            |          |       |      |                   |             |             |           |       |      |
|---------------|----------------------------|----------|-------|------|-------------------|-------------|-------------|-----------|-------|------|
| clonotype789  | CARAVRDFWSGYQTTNDYW        | IGHV4-34 | IGHJ4 | IGHM |                   |             |             | IGKV3-15  | IGKJ1 | IGKC |
| clonotype2096 | CARGGRPFVSGVPTATRYWYFDIW   | IGHV4-34 | IGHJ2 | IGHM |                   |             |             | IGKV3-20  | IGKJ5 | IGKC |
| clonotype2789 | CARGLRFLAAAGIW             | IGHV4-34 | IGHJ4 | IGHM |                   |             |             | IGKV3-20  | IGKJ2 | IGKC |
| clonotype238  | CARGPEQLYAYW               | IGHV4-34 | IGHJ4 | IGHM |                   |             |             | IGKV3-20  | IGKJ1 | IGKC |
| clonotype5163 | CARRGGVRRWLQQTVPVDYW       | IGHV4-34 | IGHJ4 | IGHM |                   |             |             | IGKV3-20  | IGKJ1 | IGKC |
| clonotype3603 | CARGRIPDSGSYKDW            | IGHV4-34 | IGHJ4 | IGHM |                   |             |             | IGKV3-20  | IGKJ1 | IGKC |
| clonotype3808 | CARKNGGYVYKPPFDYW          | IGHV4-34 | IGHJ4 | IGHM |                   |             |             | IGKV3-20  | IGKJ5 | IGKC |
| clonotype3168 | CARGLAVRVGVFGYW            | IGHV4-34 | IGHJ4 | IGHM |                   |             |             | IGKV3-20  | IGKJ3 | IGKC |
| clonotype1678 | CARAYGSGSYLFYFDYW          | IGHV4-34 | IGHJ4 | IGHM |                   |             |             | IGKV3-20  | IGKJ1 | IGKC |
| clonotype3091 | CARGPVFVVMIRPFQPW          | IGHV4-34 | IGHJ4 | IGHM |                   |             |             | IGKV3-20  | IGKJ5 | IGKC |
| clonotype4405 | CARGPIVVPAALVSGGVSYFFDYW   | IGHV4-34 | IGHJ4 | IGHM |                   |             |             | IGKV3-20  | IGKJ4 | IGKC |
| clonotype4219 | CARVRPYYYSGFLKGPFDYW       | IGHV4-34 | IGHJ4 | IGHM |                   |             |             | IGKV3-20  | IGKJ3 | IGKC |
| clonotype440  | CARGGLWFLGRKANWFDPW        | IGHV4-34 | IGHJ5 | IGHM |                   |             |             | IGKV3-20  | IGKJ4 | IGKC |
| clonotype4062 | CARGVSPWLFYWFDPW           | IGHV4-34 | IGHJ5 | IGHM |                   |             |             | IGKV3-20  | IGKJ1 | IGKC |
| clonotype4764 | CARVSRITVTGGWFDPW          | IGHV4-34 | IGHJ5 | IGHM |                   |             |             | IGKV3-20  | IGKJ1 | IGKC |
| clonotype1862 | CARGLRRVSGWYDYW            | IGHV4-34 | IGHJ5 | IGHM |                   |             |             | IGKV3-20  | IGKJ5 | IGKC |
| clonotype3411 | CARGGPQAGTVPVGGDYYYGMDVW   | IGHV4-34 | IGHJ6 | IGHM |                   |             |             | IGKV3-20  | IGKJ4 | IGKC |
| clonotype2263 | CARGYPIVVPAADRSLSYYYGMDVW  | IGHV4-34 | IGHJ6 | IGHM |                   |             |             | IGKV3-20  | IGKJ1 | IGKC |
| clonotype4669 | CARGNLFIRGYTHGGDYW         | IGHV4-34 | IGHJ4 | IGHM |                   |             |             | IGKV3D-15 | IGKJ1 | IGKC |
| clonotype4014 | CAREVRLQLWLRGGMDVW         | IGHV4-34 | IGHJ6 | IGHM |                   |             |             | IGKV3D-15 | IGKJ2 | IGKC |
| clonotype5039 | CARRSGNSSGWYPRPRAFDIW      | IGHV4-34 | IGHJ3 | IGHM |                   |             |             | IGKV4-1   | IGKJ2 | IGKC |
| clonotype1683 | CARGPLTPGAFDIW             | IGHV4-34 | IGHJ3 | IGHM |                   |             |             | IGKV4-1   | IGKJ1 | IGKC |
| clonotype1310 | CARVGRGGYKRAEFDYW          | IGHV4-34 | IGHJ4 | IGHM |                   |             |             | IGKV4-1   | IGKJ4 | IGKC |
| clonotype2954 | CARGRSRVYFDYW              | IGHV4-34 | IGHJ4 | IGHM |                   |             |             | IGKV4-1   | IGKJ5 | IGKC |
| clonotype2068 | CASTHFGVVTDYW              | IGHV4-34 | IGHJ4 | IGHM |                   |             |             | IGKV4-1   | IGKJ4 | IGKC |
| clonotype604  | CARGHRYNWFDPW              | IGHV4-34 | IGHJ5 | IGHM |                   |             |             | IGKV4-1   | IGKJ4 | IGKC |
| clonotype2374 | CARRRQQRMGAWFDPW           | IGHV4-34 | IGHJ5 | IGHM |                   |             |             | IGKV4-1   | IGKJ2 | IGKC |
| clonotype3229 | CARGPHRSWYAPGFDPW          | IGHV4-34 | IGHJ5 | IGHM |                   |             |             | IGKV4-1   | IGKJ1 | IGKC |
| clonotype3218 | CARDKGLGYWARNYYYGMDVW      | IGHV4-34 | IGHJ6 | IGHM |                   |             |             | IGKV4-1   | IGKJ4 | IGKC |
| clonotype3247 | CARSRSYYYGMDVW             | IGHV4-34 | IGHJ6 | IGHM |                   |             |             | IGKV4-1   | IGKJ1 | IGKC |
| clonotype5145 | CARGRTRYCSSTSCYRAYYYYGMDVW | IGHV4-34 | IGHJ6 | IGHM |                   |             |             | IGKV4-1   | IGKJ1 | IGKC |
| clonotype4706 | CARDCLCKDGYVEDYW           | IGHV4-34 | IGHJ4 | IGHM | IGLV1-40          | IGLJ2       | IGLC2       |           |       |      |
| clonotype2790 | CARGAALGYCSGGSCRHRHRGWFDPW | IGHV4-34 | IGHJ5 | IGHM | IGLV1-40          | IGLJ3       | IGLC3       |           |       |      |
| clonotype5332 | CARGGSLPANPMDVW            | IGHV4-34 | IGHJ6 | IGHM | IGLV1-40          | IGLJ2       | IGLC2       |           |       |      |
| clonotype2350 | CASLRYRAARYYYYGMDVW        | IGHV4-34 | IGHJ6 | IGHM | IGLV1-40          | IGLJ1       | IGLC1       |           |       |      |
| clonotype3983 | CARGMVRGVITTPGGMDVW        | IGHV4-34 | IGHJ6 | IGHM | IGLV1-40          | IGLJ2       | IGLC3       |           |       |      |
| clonotype2511 | CATLLGYCSGGSCYHNWFDPW      | IGHV4-34 | IGHJ5 | IGHM | IGLV1-40;IGLV9-49 | IGLJ1;IGLJ2 | IGLC1;IGLC2 |           |       |      |
| clonotype4914 | CARSSIVVVAAKNAFDIW         | IGHV4-34 | IGHJ3 | IGHM | IGLV1-44          | IGLJ2       | IGLC2       |           |       |      |
| clonotype1843 | CAREGYSNYWFDPW             | IGHV4-34 | IGHJ5 | IGHM | IGLV1-44          | IGLJ3       | IGLC3       |           |       |      |
| clonotype3232 | CARGLKLWLRGGYGGMDVW        | IGHV4-34 | IGHJ6 | IGHM | IGLV1-44          | IGLJ2       | IGLC2       |           |       |      |
| clonotype636  | CARGVTIFGEGVPFGYW          | IGHV4-34 | IGHJ4 | IGHM | IGLV1-47          | IGLJ3       | IGLC3       |           |       |      |
| clonotype4421 | CARVSSSHKDYGMDVW           | IGHV4-34 | IGHJ6 | IGHM | IGLV1-47          | IGLJ2       | IGLC2       |           |       |      |
| clonotype2042 | CARRPYDFWSGYTGLLPLGGMDVW   | IGHV4-34 | IGHJ6 | IGHM | IGLV1-47          | IGLJ2       | IGLC3       |           |       |      |
| clonotype42   | CARGHRTRGYSYGYRNDAFDIW     | IGHV4-34 | IGHJ3 | IGHM | IGLV1-51          | IGLJ2       | IGLC2       |           |       |      |
| clonotype4477 | CATSSIAARWLGPSVVGRAAPFDYW  | IGHV4-34 | IGHJ4 | IGHM | IGLV1-51          | IGLJ2       | IGLC2       |           |       |      |
| clonotype3331 | CARYAPRAAQQLVVRVGYFFDYW    | IGHV4-34 | IGHJ4 | IGHM | IGLV1-51          | IGLJ1       | IGLC1       |           |       |      |
| clonotype3216 | CASLYGSSAYFYW              | IGHV4-34 | IGHJ4 | IGHM | IGLV1-51          | IGLJ2       | IGLC3       |           |       |      |
| clonotype1508 | CARRVVVAGTNNWFDPW          | IGHV4-34 | IGHJ5 | IGHM | IGLV1-51          | IGLJ2       | IGLC3       |           |       |      |
| clonotype4358 | CARGRTMTRRRNWFDPW          | IGHV4-34 | IGHJ5 | IGHM | IGLV1-51          | IGLJ3       | IGLC3       |           |       |      |
| clonotype1469 | CARGRYGDKNWFDPW            | IGHV4-34 | IGHJ5 | IGHM | IGLV1-51          | IGLJ3       | IGLC3       |           |       |      |
| clonotype4462 | CARGRGVWATRGYYGLDVW        | IGHV4-34 | IGHJ6 | IGHM | IGLV1-51          | IGLJ1       | IGLC1       |           |       |      |
| clonotype593  | CARSPRHFPSYSRPNAFDIW       | IGHV4-34 | IGHJ3 | IGHM | IGLV2-11          | IGLJ3       | IGLC3       |           |       |      |
| clonotype5289 | CARWHRSHYDSSGYYSRDYFFDYW   | IGHV4-34 | IGHJ4 | IGHM | IGLV2-11          | IGLJ2       | IGLC2       |           |       |      |
| clonotype4115 | CAREHYDFWSGYLVLVDYW        | IGHV4-34 | IGHJ4 | IGHM | IGLV2-11          | IGLJ1       | IGLC1       |           |       |      |

|  |               |                             |          |       |      |          |       |       |  |  |
|--|---------------|-----------------------------|----------|-------|------|----------|-------|-------|--|--|
|  | clonotype857  | CARGHDFWSGYWGNWFDPW         | IGHV4-34 | IGHJ5 | IGHM | IGLV2-11 | IGLJ1 | IGLC1 |  |  |
|  | clonotype5130 | CARNVVGGVAFEIW              | IGHV4-34 | IGHJ3 | IGHM | IGLV2-14 | IGLJ2 | IGLC3 |  |  |
|  | clonotype1614 | CARGRYW                     | IGHV4-34 | IGHJ4 | IGHM | IGLV2-14 | IGLJ2 | IGLC2 |  |  |
|  | clonotype1728 | CARGPVVPAAIHYFDYW           | IGHV4-34 | IGHJ4 | IGHM | IGLV2-14 | IGLJ2 | IGLC3 |  |  |
|  | clonotype3721 | CARVAGYYDSSGYSYFDYW         | IGHV4-34 | IGHJ4 | IGHM | IGLV2-14 | IGLJ1 | IGLC1 |  |  |
|  | clonotype1690 | CARGPLNIGNWNYLPRPLYYYGMDVW  | IGHV4-34 | IGHJ6 | IGHM | IGLV2-14 | IGLJ3 | IGLC3 |  |  |
|  | clonotype2792 | CARGSRDHSSGWYRFHYGMDVW      | IGHV4-34 | IGHJ6 | IGHM | IGLV2-14 | IGLJ1 | IGLC1 |  |  |
|  | clonotype4122 | CQTRSWRGDPLKVW              | IGHV4-34 | IGHJ2 | IGHM | IGLV2-23 | IGLJ2 | IGLC3 |  |  |
|  | clonotype4798 | CARGTAAYYFDYW               | IGHV4-34 | IGHJ4 | IGHM | IGLV2-23 | IGLJ1 | IGLC1 |  |  |
|  | clonotype792  | CAGRIAVSEAGAYW              | IGHV4-34 | IGHJ4 | IGHM | IGLV2-23 | IGLJ2 | IGLC3 |  |  |
|  | clonotype784  | CARSRGWYSGVRFDPW            | IGHV4-34 | IGHJ5 | IGHM | IGLV2-23 | IGLJ2 | IGLC2 |  |  |
|  | clonotype3989 | CARGLVRFRRGGGYW             | IGHV4-34 | IGHJ4 | IGHM | IGLV2-8  | IGLJ2 | IGLC2 |  |  |
|  | clonotype940  | CAAGLHARGDDAFDIW            | IGHV4-34 | IGHJ3 | IGHM | IGLV3-1  | IGLJ2 | IGLC2 |  |  |
|  | clonotype539  | CARGRGDGYNLDYW              | IGHV4-34 | IGHJ4 | IGHM | IGLV3-1  | IGLJ2 | IGLC2 |  |  |
|  | clonotype920  | CARGPWDIVVVAAPPGWWFDPW      | IGHV4-34 | IGHJ5 | IGHM | IGLV3-1  | IGLJ2 | IGLC2 |  |  |
|  | clonotype4745 | CAREPIPSLRVVFNSGFDVW        | IGHV4-34 | IGHJ6 | IGHM | IGLV3-1  | IGLJ2 | IGLC2 |  |  |
|  | clonotype1939 | CALPPhRRYYDFWSGYSFQHW       | IGHV4-34 | IGHJ1 | IGHM | IGLV3-19 | IGLJ2 | IGLC3 |  |  |
|  | clonotype2551 | CARGNTYDSRYFDLW             | IGHV4-34 | IGHJ2 | IGHM | IGLV3-19 | IGLJ2 | IGLC2 |  |  |
|  | clonotype318  | CARAGIGVARPYFDYW            | IGHV4-34 | IGHJ4 | IGHM | IGLV3-19 | IGLJ2 | IGLC2 |  |  |
|  | clonotype1577 | CARPRGWQQYTFDYW             | IGHV4-34 | IGHJ4 | IGHM | IGLV3-19 | IGLJ2 | IGLC3 |  |  |
|  | clonotype1479 | CARGVIGYCSSTSCGLRIQLWLYFDYW | IGHV4-34 | IGHJ4 | IGHM | IGLV3-19 | IGLJ3 | IGLC3 |  |  |
|  | clonotype383  | CARGFYDSSGYLSLFDYW          | IGHV4-34 | IGHJ4 | IGHM | IGLV3-19 | IGLJ1 | IGLC1 |  |  |
|  | clonotype3549 | CARGGRGYDSSGYGYW            | IGHV4-34 | IGHJ4 | IGHM | IGLV3-19 | IGLJ1 | IGLC1 |  |  |
|  | clonotype4907 | CARGRKGVIYLTGYLDYW          | IGHV4-34 | IGHJ4 | IGHM | IGLV3-19 | IGLJ2 | IGLC2 |  |  |
|  | clonotype1318 | CARLWFRKILYSYGYNRFDPW       | IGHV4-34 | IGHJ5 | IGHM | IGLV3-19 | IGLJ2 | IGLC2 |  |  |
|  | clonotype2235 | CARAVYYASWFDPW              | IGHV4-34 | IGHJ5 | IGHM | IGLV3-19 | IGLJ2 | IGLC3 |  |  |
|  | clonotype4325 | CARAMGIVVPAAINWFDPW         | IGHV4-34 | IGHJ5 | IGHM | IGLV3-19 | IGLJ2 | IGLC3 |  |  |
|  | clonotype1785 | CARGGYSYGYDWFDPW            | IGHV4-34 | IGHJ5 | IGHM | IGLV3-19 | IGLJ2 | IGLC2 |  |  |
|  | clonotype1457 | CARGRLWFGELHYYYYGMDVW       | IGHV4-34 | IGHJ6 | IGHM | IGLV3-19 | IGLJ2 | IGLC2 |  |  |
|  | clonotype4234 | CARPRQGVW                   | IGHV4-34 | IGHJ6 | IGHM | IGLV3-19 | IGLJ2 | IGLC3 |  |  |
|  | clonotype1578 | CARDCYGFGYGMVDVW            | IGHV4-34 | IGHJ6 | IGHM | IGLV3-25 | IGLJ3 | IGLC3 |  |  |
|  | clonotype715  | CARAPRHYDSSGYQGSREYYGMDVW   | IGHV4-34 | IGHJ6 | IGHM | IGLV3-25 | IGLJ2 | IGLC3 |  |  |
|  | clonotype4956 | CARRLAVAGTVDYW              | IGHV4-34 | IGHJ4 | IGHM | IGLV7-43 | IGLJ3 | IGLC3 |  |  |
|  | clonotype2914 | CARGLGWCSSTSCQPKKAMDVW      | IGHV4-34 | IGHJ6 | IGHM | IGLV7-43 | IGLJ3 | IGLC3 |  |  |
|  | clonotype1117 | CARGHYDVWGSYRNEPSLRAVW      | IGHV4-34 | IGHJ6 | IGHM | IGLV9-49 | IGLJ3 | IGLC3 |  |  |

| Sample | clonotype_id  | igh_cdr3s                 | igh_v-genes | igh_j | igh_c | igl_v-genes | igl_j | igl_c | igk_v_genes | igk_j | igk_c |
|--------|---------------|---------------------------|-------------|-------|-------|-------------|-------|-------|-------------|-------|-------|
| HC-19  | clonotype916  | CARGRRYCSGGSCYEFRRRLWFDPW | IGHV4-34    | IGHJ5 | IGHM  |             |       |       | IGKV1-5     | IGKJ3 | IGKC  |
|        | clonotype1032 | CARGDWLTPNLHNYYYGMDVW     | IGHV4-34    | IGHJ6 | IGHM  |             |       |       | IGKV1-5     | IGKJ1 | IGKC  |
|        | clonotype1026 | CARIRVPHYYVKSSYFDYW       | IGHV4-34    | IGHJ4 | IGHM  |             |       |       | IGKV1-8     | IGKJ1 | IGKC  |
|        | clonotype1400 | CARASTYGGNIYYGMDVW        | IGHV4-34    | IGHJ6 | IGHM  |             |       |       | IGKV1-8     | IGKJ2 | IGKC  |
|        | clonotype428  | CARGPSQETLVGFDYW          | IGHV4-34    | IGHJ4 | IGHM  |             |       |       | IGKV1-9     | IGKJ1 | IGKC  |
|        | clonotype1185 | CARGRPSKTFYDNKYVMDVW      | IGHV4-34    | IGHJ6 | IGHD  |             |       |       | IGKV1-9     | IGKJ1 | IGKC  |
|        | clonotype1310 | CARGRVVYPYVPKYYFDYW       | IGHV4-34    | IGHJ4 | IGHD  |             |       |       | IGKV1-16    | IGKJ2 | IGKC  |
|        | clonotype451  | CAREKVNPLQSFYW            | IGHV4-34    | IGHJ4 | IGHM  |             |       |       | IGKV1-17    | IGKJ1 | IGKC  |
|        | clonotype1677 | CAREVEYCGGDCHWFDPW        | IGHV4-34    | IGHJ5 | IGHM  |             |       |       | IGKV1-17    | IGKJ4 | IGKC  |
|        | clonotype1957 | CARGLYGGNSRFYW            | IGHV4-34    | IGHJ4 | IGHM  |             |       |       | IGKV1D-39   | IGKJ1 | IGKC  |
|        | clonotype356  | CARGFWYSSPPVDW            | IGHV4-34    | IGHJ4 | IGHM  |             |       |       | IGKV1D-39   | IGKJ1 | IGKC  |
|        | clonotype1416 | CARGMSPYSGHNNWAFDYW       | IGHV4-34    | IGHJ4 | IGHM  |             |       |       | IGKV1D-39   | IGKJ2 | IGKC  |
|        | clonotype38   | CARVSGYCSSTSCYRGYYYGMDVW  | IGHV4-34    | IGHJ6 | IGHM  |             |       |       | IGKV1D-39   | IGKJ2 | IGKC  |
|        | clonotype61   | CARGLLGISGMDVW            | IGHV4-34    | IGHJ6 | IGHM  |             |       |       | IGKV1D-39   | IGKJ1 | IGKC  |
|        | clonotype189  | CARRLPRVVGSSVDAFDIW       | IGHV4-34    | IGHJ3 | IGHD  |             |       |       | IGKV1D-39   | IGKJ1 | IGKC  |
|        | clonotype553  | CARGEYYDSSGYYYYYYGMDVW    | IGHV4-34    | IGHJ6 | IGHD  |             |       |       | IGKV1D-39   | IGKJ1 | IGKC  |
|        | clonotype81   | CARGKMAVAGRNPSDFYW        | IGHV4-34    | IGHJ4 | IGHM  |             |       |       | IGKV2-24    | IGKJ4 | IGKC  |

|               |                            |          |       |      |          |       |       |           |       |      |
|---------------|----------------------------|----------|-------|------|----------|-------|-------|-----------|-------|------|
| clonotype1255 | CARKNLKIGRGYSYGPTRYFDYW    | IGHV4-34 | IGHJ4 | IGHM |          |       |       | IGKV2-28  | IGKJ1 | IGKC |
| clonotype499  | CARSLFDIW                  | IGHV4-34 | IGHJ3 | IGHM |          |       |       | IGKV2D-29 | IGKJ4 | IGKC |
| clonotype374  | CARSLFDIW                  | IGHV4-34 | IGHJ3 | IGHM |          |       |       | IGKV2D-29 | IGKJ4 | IGKC |
| clonotype2094 | CARGRRIVSGYSSGWYRPRYFDYW   | IGHV4-34 | IGHJ4 | IGHM |          |       |       | IGKV2D-29 | IGKJ2 | IGKC |
| clonotype1522 | CARGRGDYRTSTTDYYYGMDVW     | IGHV4-34 | IGHJ6 | IGHM |          |       |       | IGKV2D-29 | IGKJ4 | IGKC |
| clonotype779  | CARLGTTKRRRTGFDIW          | IGHV4-34 | IGHJ3 | IGHM |          |       |       | IGKV3-11  | IGKJ4 | IGKC |
| clonotype911  | CASLNIAAHGW                | IGHV4-34 | IGHJ4 | IGHM |          |       |       | IGKV3-11  | IGKJ4 | IGKC |
| clonotype243  | CARVAIAVSYYFDYW            | IGHV4-34 | IGHJ4 | IGHM |          |       |       | IGKV3-15  | IGKJ4 | IGKC |
| clonotype105  | CARGEYYDSSGYYYYYYGMVDW     | IGHV4-34 | IGHJ6 | IGHM |          |       |       | IGKV3-15  | IGKJ1 | IGKC |
| clonotype549  | CARGFDVIVATMSTFRAFDIW      | IGHV4-34 | IGHJ3 | IGHD |          |       |       | IGKV3-15  | IGKJ5 | IGKC |
| clonotype608  | CARVPGAFDIW                | IGHV4-34 | IGHJ3 | IGHM |          |       |       | IGKV3-20  | IGKJ2 | IGKC |
| clonotype1811 | CARGGYDSSGYPTPGWGFDDYW     | IGHV4-34 | IGHJ4 | IGHM |          |       |       | IGKV3-20  | IGKJ2 | IGKC |
| clonotype102  | CARGRRPYLGVFDPW            | IGHV4-34 | IGHJ5 | IGHM |          |       |       | IGKV3-20  | IGKJ1 | IGKC |
| clonotype391  | CARAYCSNISCYPYNWFDPW       | IGHV4-34 | IGHJ5 | IGHM |          |       |       | IGKV3-20  | IGKJ1 | IGKC |
| clonotype330  | CASSDVRTVTTRPHYYYYYYGMVDW  | IGHV4-34 | IGHJ6 | IGHM |          |       |       | IGKV3-20  | IGKJ1 | IGKC |
| clonotype1585 | CARGPGSSSPYRKYFDYW         | IGHV4-34 | IGHJ4 | IGHM |          |       |       | IGKV3D-15 | IGKJ4 | IGKC |
| clonotype1057 | CARGQHQQYYGSGSPGFDYW       | IGHV4-34 | IGHJ4 | IGHM |          |       |       | IGKV3D-15 | IGKJ3 | IGKC |
| clonotype77   | CARGRHGSREIGGWFDPW         | IGHV4-34 | IGHJ5 | IGHM |          |       |       | IGKV3D-15 | IGKJ1 | IGKC |
| clonotype1452 | CARGYGPRADQMIVVVITGSSWFDPW | IGHV4-34 | IGHJ5 | IGHM |          |       |       | IGKV3D-15 | IGKJ5 | IGKC |
| clonotype1535 | CARRVGYCSSTSCYHPPSNWYFDLW  | IGHV4-34 | IGHJ2 | IGHM |          |       |       | IGKV4-1   | IGKJ3 | IGKC |
| clonotype576  | CARGKRGYSYGFWAFFDIW        | IGHV4-34 | IGHJ3 | IGHM |          |       |       | IGKV4-1   | IGKJ2 | IGKC |
| clonotype2001 | CAGGYSSGWIANLDYW           | IGHV4-34 | IGHJ4 | IGHM |          |       |       | IGKV4-1   | IGKJ4 | IGKC |
| clonotype293  | CTRGEDYTKQGYW              | IGHV4-34 | IGHJ4 | IGHM |          |       |       | IGKV4-1   | IGKJ1 | IGKC |
| clonotype1566 | CARALPPVEMATISRAGAGYFDYW   | IGHV4-34 | IGHJ4 | IGHM |          |       |       | IGKV4-1   | IGKJ4 | IGKC |
| clonotype1359 | CARAVPQRIAVAGTRVSPVWFDPW   | IGHV4-34 | IGHJ5 | IGHM |          |       |       | IGKV4-1   | IGKJ1 | IGKC |
| clonotype588  | CARAPSIRVVVAATGMWFDPW      | IGHV4-34 | IGHJ5 | IGHD |          |       |       | IGKV4-1   | IGKJ1 | IGKC |
| clonotype175  | CARESSSVVDYW               | IGHV4-34 | IGHJ4 | IGHM | IGLV1-40 | IGLJ2 | IGLC2 |           |       |      |
| clonotype2007 | CARARDIVVVVAATHFDYW        | IGHV4-34 | IGHJ4 | IGHM | IGLV1-40 | IGLJ2 | IGLC2 |           |       |      |
| clonotype1332 | CARGTAGDSTPKDWFDPW         | IGHV4-34 | IGHJ5 | IGHM | IGLV1-40 | IGLJ3 | IGLC3 |           |       |      |
| clonotype669  | CARGQADSRIAARPDWVPRGVWFDPW | IGHV4-34 | IGHJ5 | IGHM | IGLV1-40 | IGLJ3 | IGLC3 |           |       |      |
| clonotype194  | CARGVGGIAAANRMDVW          | IGHV4-34 | IGHJ6 | IGHM | IGLV1-40 | IGLJ2 | IGLC2 |           |       |      |
| clonotype521  | CARIIVVPAIYGMVDW           | IGHV4-34 | IGHJ6 | IGHM | IGLV1-40 | IGLJ3 | IGLC3 |           |       |      |
| clonotype2098 | CARGPVHPEKRGGEDYFDYW       | IGHV4-34 | IGHJ4 | IGHM | IGLV1-44 | IGLJ2 | IGLC2 |           |       |      |
| clonotype1759 | CARAIGGYYRFVYFDYW          | IGHV4-34 | IGHJ4 | IGHM | IGLV1-47 | IGLJ3 | IGLC3 |           |       |      |
| clonotype92   | CARDPEYYDSSGYFGPEYYFDYW    | IGHV4-34 | IGHJ4 | IGHM | IGLV1-47 | IGLJ3 | IGLC3 |           |       |      |
| clonotype1448 | CARGGRYTKELRRGSRFYFDYW     | IGHV4-34 | IGHJ4 | IGHM | IGLV1-51 | IGLJ2 | IGLC2 |           |       |      |
| clonotype930  | CARALQSSGYRYRCPYFDYW       | IGHV4-34 | IGHJ4 | IGHM | IGLV1-51 | IGLJ3 | IGLC3 |           |       |      |
| clonotype625  | CAREGDPGIAVAGFDYW          | IGHV4-34 | IGHJ4 | IGHM | IGLV2-11 | IGLJ3 | IGLC3 |           |       |      |
| clonotype965  | CARSIAAAGTSGVRYFDLW        | IGHV4-34 | IGHJ2 | IGHM | IGLV2-14 | IGLJ2 | IGLC2 |           |       |      |
| clonotype1396 | CARGKLGYPYSYAPHSFDFDYW     | IGHV4-34 | IGHJ4 | IGHM | IGLV2-14 | IGLJ2 | IGLC2 |           |       |      |
| clonotype734  | CARELPYGVVIPHIFDYW         | IGHV4-34 | IGHJ4 | IGHM | IGLV2-14 | IGLJ3 | IGLC3 |           |       |      |
| clonotype895  | CARGIAWGYDSSGYHKGYFDYW     | IGHV4-34 | IGHJ4 | IGHM | IGLV2-14 | IGLJ3 | IGLC3 |           |       |      |
| clonotype756  | CAGALPELPPYAFDYW           | IGHV4-34 | IGHJ4 | IGHD | IGLV2-18 | IGLJ3 | IGLC3 |           |       |      |
| clonotype1972 | CARSWENSSGYYYDYW           | IGHV4-34 | IGHJ4 | IGHM | IGLV2-23 | IGLJ2 | IGLC2 |           |       |      |
| clonotype557  | CARVHQLVDIRDWFDPW          | IGHV4-34 | IGHJ5 | IGHM | IGLV3-1  | IGLJ2 | IGLC2 |           |       |      |
| clonotype1717 | CARGYIVVPAATVNYFDYW        | IGHV4-34 | IGHJ4 | IGHM | IGLV3-19 | IGLJ2 | IGLC2 |           |       |      |
| clonotype1466 | CARGRVIGLSRYDFWSGSHMDVW    | IGHV4-34 | IGHJ6 | IGHM | IGLV3-19 | IGLJ2 | IGLC2 |           |       |      |
| clonotype1549 | CARGHFHPLDTSGGSSRSWFDPW    | IGHV4-34 | IGHJ5 | IGHD | IGLV3-19 | IGLJ2 | IGLC2 |           |       |      |
| clonotype1165 | CARGTPPLSSGWYRGWFDPW       | IGHV4-34 | IGHJ5 | IGHM | IGLV3-9  | IGLJ2 | IGLC2 |           |       |      |
| clonotype1550 | CARGALNLFVYLNQTPGKRGIFDYW  | IGHV4-34 | IGHJ4 | IGHM | IGLV9-49 | IGLJ3 | IGLC3 |           |       |      |

Sequences from each sample are organized by VK followed by VL gene expression
